# Supplementary material for: Serum metabolomic signatures of gestational diabetes in South Asian and white European women
Source: PubMed Central journal article supplement — BMJ Open Diabetes Res Care. 2022 Apr 21;10(2):e002733. doi: 10.1136/bmjdrc-2021-002733 (PMC9024260; doi:10.1136/bmjdrc-2021-002733), 2022-04-21
Supplement: bmjdrc-2021-002733supp001.pdf [file bmjdrc-2021-002733supp001.pdf]

## **Serum metabolomic signatures of Gestational Diabetes in South Asian and white European women**

### **ONLINE-ONLY SUPPLEMENTAL MATERIAL**

#### **Table of Contents**

#### **Supplemental Tables**

Supplemental Table S1. Summary of metabolomic studies (excluding glucose) investigating metabolite profile significantly associated with GDM, stratified by biospecimen collection time

Supplemental Table S2. Key characteristics of studies up to November 2020 investigating metabolites associated with GDM (n = 61 studies)

Supplemental Table S3. Fasting serum metabolites measured in START (n = 63) and FAMILY (n = 62) using MSI-CE-MS

Supplemental Table S4. Metabolites that were significantly associated with GDM status (univariate  $p < 0.10$ )

Supplemental Table S5. Median (IQR) metabolite concentrations (micromoles,  $\mu\text{mol}$ ), metabolites with univariate  $p < 0.10$ , IADPSG diagnostic criteria, START and FAMILY

Supplemental Table S6. Results of k-fold cross validation for relationship between metabolites and GDM, adjusted for ethnicity, maternal age, maternal height, pre-pregnancy BMI, gestational age at recruitment, family history of diabetes, smoking history, and diet quality (k = 10), START and FAMILY (n = 590)

Supplemental Table S7. Ethnic-specific associations between metabolites and odds of GDM (95% CI), per 1-SD log-transformed metabolite RPA, IADPSG diagnostic criteria

Supplemental Table S8. Metabolic pathways significantly impacted by GDM, with  $p < 0.05$  and impact  $> 0.10$ , sorted by impact, KEGG database, by cohort

Supplemental Table S9. Associations between metabolites and odds of GDM (95% CI), per 1-SD log-transformed metabolite RPA, sensitivity analyses: a) unadjusted vs adjusted b) IADPSG vs. Born in Bradford criteria c) complete case vs. multiple imputation, among metabolites univariate  $p < 0.10$  (n = 600)

#### **Supplemental Figures**

Supplemental Figure S1. Standardized mean difference (95% CI) in serum metabolites, comparing women with GDM (n = 133) to women without GDM (n = 457),  $p < 0.05$

Supplemental Figure S2. Correlation plot of metabolites significantly associated with GDM ( $p < 0.10$ ), IADPSG diagnostic criteria, START and FAMILY

Supplemental Figure S3. Schematic of the metabolic pathways, and their inter-relationships, associated with GDM in START and FAMILY

Supplemental Figure S4. Partial least-squares discriminant analysis (PLS-DA) results, scores plot and variable importance plot, among women with GDM (n = 133), IADPSG diagnostic criteria, comparing metabolites concentrations between South Asian (START study; n = 81) and white European women (FAMILY study; n = 52)

Supplemental Figure S5. Standardized mean difference (95% CI) in serum metabolites among women with GDM (n = 133), comparing South Asian (n = 81) to white European (n = 52) women, p < 0.05

Supplemental Figure S6. Standardized mean difference (95% CI) in serum metabolites among all women (n = 590), comparing South Asian (n = 299) to white European (n = 291) women, p < 0.05

Supplemental Figure S7. Partial least-squares discriminant analysis (PLS-DA) results, scores plot and variable importance plot, IADPSG diagnostic criteria, START and FAMILY

References

**Supplemental Table S1.**

**Search details:** We updated the systematic reviews of Huynh et al. and Chen et al., (1-2), by searching MEDLINE (via Ovid 2017 to November 30, 2020), using search terms “*metabolomic\**”, “*metabonomic\**”, “*magnetic spectroscopy*”, “*mass spectrometry*”, “*metabolic profil\**”, “*amino acid\**”, “*metabolite\**”, or “*metabolome\**” were combined with “*gestational diabete\**”. An update was deemed appropriate based on guidance from the panel for updating guidance for systematic reviews (PUGs), which suggest that a review can be updated if the previous reviews are well conducted, address the same question, and uses valid methods (3). We included any studies that included pregnant women classified as having GDM, that used metabolomic techniques such as LC-MS or NMR spectroscopy, and metabolites were examined in maternal plasma, serum, urine, hair, placenta, or amniotic fluid. Studies were excluded if they were randomized control trials, did not have an appropriate control group, or were not in English. There were 234 eligible articles based on our 2017–November 30, 2020 search, of which 34 final articles were retained (excluded n = 1 duplicate; n = 170 not about metabolites or GDM; n = 16 animal studies; n = 2 not in English; n = 5 collected >3 years post-partum; n = 6 no appropriate control).

**Summary of metabolomic studies (excluding glucose) investigating metabolite profile significantly associated with GDM, stratified by biospecimen collection time**

| Author, Year Country                                   | Study design & (Analytical platform)                              | Sample collection time | Bio-specimens (fasting?)               | n GDM/ non-GDM | GDM diagnostic criteria                        | Metabolites in GDM vs. non-GDM                                                                                                       |                                                                                                   |                                                                                                                                                                                                         |
|--------------------------------------------------------|-------------------------------------------------------------------|------------------------|----------------------------------------|----------------|------------------------------------------------|--------------------------------------------------------------------------------------------------------------------------------------|---------------------------------------------------------------------------------------------------|---------------------------------------------------------------------------------------------------------------------------------------------------------------------------------------------------------|
|                                                        |                                                                   |                        |                                        |                |                                                | Upregulated (higher [ ] = increased GDM)                                                                                             | Downregulated (higher [ ] decreased GDM)                                                          | No change                                                                                                                                                                                               |
| <b>A. COLLECTED PRIOR TO GDM DIAGNOSIS (N = 25)</b>    |                                                                   |                        |                                        |                |                                                |                                                                                                                                      |                                                                                                   |                                                                                                                                                                                                         |
| Chen, 2010 US (45% Hispanic, 38% Black, 17% other) [4] | Nested case-control (targeted on FA, GC-MS)                       | 15 weeks GA            | Serum (fasting)                        | 49/98          | Carpenter–Coustan criteria (dx at 28 weeks GA) | Myristic acid, palmitic acid, palmitoleic acid, EPA, NEFAs, total SFAs                                                               | None                                                                                              | Stearic acid, oleic acid, linoleic acid, linolenic acid, arachidonic acid, DHA                                                                                                                          |
| Graça, 2010 Portugal* [5]                              | Nested case-control (untargeted, <sup>1</sup> H NMR spectroscopy) | 14-25 weeks GA         | Amniotic fluid (non-fasting)           | 27/82          | Unknown (dx at 24-28 weeks GA)                 | None                                                                                                                                 | Glycine, proline, serine, taurine, acetate, formate, creatinine, glutamate, glycerophosphocholine | Alanine, allantoin, ascorbate, α-ocoisolvalerate, citrate, glutamine, isoleucine, lactate, leucine, methionine, phenylalanine, myo-inositol, N-acetyl, pyruvate, succinate, threonine, tyrosine, valine |
| Diaz, 2011 Portugal* [6]                               | Nested case-control (untargeted, <sup>1</sup> H NMR spectroscopy) | 14-25 weeks GA         | Plasma and urine (non-fasting)         | 27/82          | Unknown                                        | Plasma: None<br>Urine: 3-hydroxyisovalerate, 2-hydroxyisobutyrate, N-methyl-nicotinamide, choline, N-methyl-2-pyridone-5-carboxamide | Plasma: trimethylamine N-oxide, betaine<br>Urine: None                                            | Plasma: 3-hydroxyisovalerate, 2-hydroxyisobutyrate, N-methyl-nicotinamide, choline, N-methyl-2-pyridone-5-carboxamide<br>Urine: Trimethylamine N-oxide, betaine                                         |
| Graça, 2012 Portugal [7]                               | Nested case-control (untargeted, UPLC-MS)                         | 15-25 weeks GA         | Amniotic fluid and urine (non-fasting) | 23/26          | Unknown (dx at 24-28 weeks GA)                 | Choline                                                                                                                              | Glutamate                                                                                         | Leucine, isoleucine, histidine, methionine, phenylalanine, valine, N-methyl-nicotinamide, hippurate, threonine, cis-aconitate, hypoxanthine, pyroglutamate                                              |

|                                      |                                                                   |                              |                              |        |                                                              |                                                                                                                                                                                                                                                                                                                                                                      |                                                                                                                                                                                  |                                                                                                                                                                                                                                                                                                                                                                                                                                                                                                                                                                                                                                                  |
|--------------------------------------|-------------------------------------------------------------------|------------------------------|------------------------------|--------|--------------------------------------------------------------|----------------------------------------------------------------------------------------------------------------------------------------------------------------------------------------------------------------------------------------------------------------------------------------------------------------------------------------------------------------------|----------------------------------------------------------------------------------------------------------------------------------------------------------------------------------|--------------------------------------------------------------------------------------------------------------------------------------------------------------------------------------------------------------------------------------------------------------------------------------------------------------------------------------------------------------------------------------------------------------------------------------------------------------------------------------------------------------------------------------------------------------------------------------------------------------------------------------------------|
| Sachse, 2012 Norway [8]              | Nested case-control (untargeted, <sup>1</sup> H NMR spectroscopy) | 8-20 weeks GA                | Urine (fasting)              | 79/530 | WHO criteria (dx at 26-30 weeks GA)                          | Citrate, lysine                                                                                                                                                                                                                                                                                                                                                      | None                                                                                                                                                                             | Valine, leucine, 3-aminoisobutyrate, 3-hydroxyisovalerate, 2-hydroxyisobutyrate, alanine, N-acetylglutamine, dimethylamine, trimethylamine N-oxide, glycine, creatine, creatinine, 1-methyl-nicotinamide, 1,6-anhydroglucose, 4-hydroxy-phenylacetate, tyrosine, histidine, formate, N-phenylacetyl-glycine                                                                                                                                                                                                                                                                                                                                      |
| Diaz, 2013 Portugal [9]              | Nested case-control (untargeted, <sup>1</sup> H NMR spectroscopy) | 14-26 weeks GA               | Urine (non-fasting)          | 42/84  | Unknown (dx at 19-38 weeks GA)                               | Choline, N-methylnicotinamide, xylose                                                                                                                                                                                                                                                                                                                                | 4-hydroxyphenylacetate, hippurate                                                                                                                                                | N-methyl-2-pyridone-5-carboxamide, desethylamiodarone, acetate, acetone, carnitine, citrate, creatine, creatinine, DMA, glycine, lactose, phenylacetyl-glutamine, tartrate, trimethylamine                                                                                                                                                                                                                                                                                                                                                                                                                                                       |
| De Seymour, 2014 New Zealand [10]    | Nested case-control (untargeted, GC-MS)                           | 20 weeks GA                  | Serum (not known if fasting) | 22/26  | Unknown                                                      | Itaconic acid, cis-aconitate                                                                                                                                                                                                                                                                                                                                         | None                                                                                                                                                                             | 2-hydroxybutyric acid, creatinine, nicotinamide, 4-methyl-2-oxopentanoic acid, cysteine, oleic acid, 9-heptadecenoic acid, ornithine, 11,14-eicosadienoic acid, EPA, DHA, palmitic acid, adrenic acid, $\gamma$ -linolenic acid, palmitoleic acid, alanine, glutamic acid, phenylalanine, arachidonic acid, glycine, proline, asparagine, isoleucine, pyruvic acid, aspartic acid, quinic acid, azelaic acid, lactic acid, serine, benzoic acid, leucine, stearic acid, linoleic acid, succinic acid, lysine, threonine, cis-vaccenic acid, margaric acid, tryptophan, citraconic acid, methionine, tyrosine, citric acid, myristic acid, valine |
| Bentley-Lewis, 2015 US [11]          | Nested case-control (untargeted, LC-MS)                           | 1 <sup>st</sup> trimester GA | Serum (fasting)              | 96/96  | Carpenter-Coustan criteria (dx in 3 <sup>rd</sup> trimester) | Anthranilic acid, allantoin, alanine, glutamate, and serine                                                                                                                                                                                                                                                                                                          | Creatinine                                                                                                                                                                       | Other metabolites measured (specific metabolites not outlined)                                                                                                                                                                                                                                                                                                                                                                                                                                                                                                                                                                                   |
| Law, 2017 China part 1 and 2 [12-13] | Nested case-control (untargeted, LC-MS)                           | 11-14 weeks GA               | Plasma (fasting)             | 27/34  | IADPSG (dx at 24-28 weeks GA)                                | Sesaminol 2-O-triglucoside, triclin 7-neohesperidoside. Pathways: tryptophan metabolism, purine nucleosides (e.g. uridine, hypoxanthine, xanthine, xanthosine), amino acid derivatives (e.g. homocitrulline), steroid and sterol conjugates (e.g. 5-androstenediol), fatty acid derivatives (e.g. 3-hydroxybutyric acid), carnitines, amino acids (e.g. D-galactose) | (2E)-14-hydroxytetradec-2-enoic acid, (2E,13R)-13-hydroxytetradec-2-enoic acid, 2,15-dihydroxypentadecanoic acid, (7R,8S,9Z,12Z,15Z)-7,8-dihydroxy-9,12,15-octadecatrienoic acid | 183 other metabolites measured (others NS)                                                                                                                                                                                                                                                                                                                                                                                                                                                                                                                                                                                                       |

|                                                                          |                                             |                |                              |          |                                                                           |                                                                                                                                                                                                                                                                |                                                                                                                                                                                                                                                                                                                                                                                                                                           |                                                                                                             |
|--------------------------------------------------------------------------|---------------------------------------------|----------------|------------------------------|----------|---------------------------------------------------------------------------|----------------------------------------------------------------------------------------------------------------------------------------------------------------------------------------------------------------------------------------------------------------|-------------------------------------------------------------------------------------------------------------------------------------------------------------------------------------------------------------------------------------------------------------------------------------------------------------------------------------------------------------------------------------------------------------------------------------------|-------------------------------------------------------------------------------------------------------------|
| Leitner, 2017 Italy [14]                                                 | Case-control (GC-MS)                        | 12-26 weeks GA | Urine (not clear if fasting) | 14/18    | IADPSG (dx at 24-28 weeks)                                                | 2-hydroxybutanoic acid, 3-hydroxybutanoic acid, valine, alanine, beta-alanine, tryptophan, b-sitosterol, octadecadienoic acid, tyrosine, leucine, phenylalanine, 2,4-dihydroxybutyrate, citrate, malate, succinate, uracil, lactate, pentahydroxyhexanoic acid | None                                                                                                                                                                                                                                                                                                                                                                                                                                      | Other metabolites measured (specific metabolites not outlined)                                              |
| Zhang, 2017 China [15]                                                   | Cohort study (HILIC-MS)                     | 9-12 weeks GA  | Serum (fasting)              | 533/5175 | IADPSG (dx at 24-28 weeks)                                                |                                                                                                                                                                                                                                                                | Thyroxin                                                                                                                                                                                                                                                                                                                                                                                                                                  | No other metabolites measured                                                                               |
| Barzilay 2018, Canada (45% European, 25% Asian, 9% Latin, 7% Black) [16] | Nested case-control (LC-MS)                 | 12-16 weeks GA | Plasma (non-fasting)         | 18/296   | Canadian Diabetes Association 2008 practice guideline (dx 24-28 weeks GA) | None                                                                                                                                                                                                                                                           | None                                                                                                                                                                                                                                                                                                                                                                                                                                      | Pyridoxal 5' phosphate, choline, dimethylglycine, betaine, trimethylamine N-oxide, homocysteine, folic acid |
| Li, 2018 China & Liu, 2020 China [17-18]                                 | Nested case-control (LC-MS)                 | <24 weeks GA   | Serum (fasting)              | 243/243  | WHO-2013 criteria (dx at 24-28 weeks GA)                                  | None                                                                                                                                                                                                                                                           | Deoxycholic acid, Glycoursodeoxycholic acid, glycochenodeoxycholic acid, glycodeoxycholic acid, taurochenodeoxycholic acid, glycocholic acid, L- $\alpha$ -lysophosphatidylcholine, LPC (15:0, 17:0, 18:0, 18:1)                                                                                                                                                                                                                          | Cholic acid, deoxycholic acid, taurocholic acid, LPC 14:0                                                   |
| O'Neill, 2018 US (90% white Europeans) [19]                              | Nested case-control (targeted, GC-MS/LC-MS) | 16-18 weeks GA | Amniotic fluid               | 20/20    | Self-report at postnatal visit                                            | 2-hydroxybutyrate, 3-(4-hydroxyphenyl)-propionate, 3-methyl-2-oxovalerate, 2-hydroxy-3-methylvalerate, LCFAs (palmitoleate, stearate, eicosenoate); PUFAs (EPA, DHA, linoleate, linolenate, dihomo-linolenate, arachidonate, DPA), stearoyl sphingomyelin      | 1,5-anhydroglucitol, glycine, betaine, histidine, pyroglutamine, phenylacetyl-glutamine, p-cresol sulfate, p-cresol-glucuronide, urea, hydrocinnamate, isovaleryl-glycine, isobutrylglycine, N2, N5-diacetylornithine, N-acetylcitrulline, 5-methylthioadensine, $\gamma$ -glutamylglycine, $\gamma$ -glutamylleucine, $\gamma$ -glutamylphenylalanine, $\gamma$ -glutamylthreonine, $\gamma$ -glutamyltyrosine, $\gamma$ -glutamylvaline | 459 metabolites measured (others NS)                                                                        |

|                                     |                                             |                            |                                   |         |                                                                 |                                                                                                                                                                                                                                                                                                                                                                                                                                                                                                                                                                                 |                                                                                                                           |                                                                                                                                                                                                   |
|-------------------------------------|---------------------------------------------|----------------------------|-----------------------------------|---------|-----------------------------------------------------------------|---------------------------------------------------------------------------------------------------------------------------------------------------------------------------------------------------------------------------------------------------------------------------------------------------------------------------------------------------------------------------------------------------------------------------------------------------------------------------------------------------------------------------------------------------------------------------------|---------------------------------------------------------------------------------------------------------------------------|---------------------------------------------------------------------------------------------------------------------------------------------------------------------------------------------------|
| Roy, 2018<br>Quebec,<br>Canada [20] | Nested case-control (targeted, UHRQ-TOF-MS) | 7-15 weeks GA              | Plasma (non-fasting)              | 50/50   | 2008 Canadian Diabetes Association criteria (dx at 24-28 weeks) | leucine, iso-butyrylcarnitine, isoleucine, tyrosine, valine                                                                                                                                                                                                                                                                                                                                                                                                                                                                                                                     | None                                                                                                                      | Acylcarnitines (C0, C2, C4, C5DC, C6, C8), arginine, glutamine, methionine,                                                                                                                       |
| Hou, 2018<br>China [21]             | Nested case-control (UPLC-TQ-MS, GC/TOF-MS) | 12 weeks GA                | Serum (fasting)                   | 131/138 | IADPSG (dx at 24-28 weeks)                                      | Acetylaspartic acid, alanine, glutamic acid, leucine, valine, 2- and 4-aminobutanoic acid, 2-hydroxybutyric acid, 2-oxo-4-methylvaleric acid, aminomalonic acid, malic acid, pyruvic acid, 1-monooleoylglycol, 2-ethylhexanoic acid, mannose, threitol, lithocholic acid, hydoexychoic acid, 6,7 diketocholic acid, fatty acids (C14:1, C16:1, C17:1, C18:1, C19:1, C20:1, C12:0, C16:0, C17:0, C20:0, C16:2, C18:2, C18:3, C22:3, C18:3, C20:4, C20:3, C20:2, C22:5), triglycerides, cholinesterase, retinol binding protein, 2-oxo-4-methylvaleric acid, 4-aminobutanoic acid | Cysteine, isoleucine, 2,3,4-trihydroxybutyric acid, maltose, threonic acid, cholic acid, dehydro-LCA, isodeoxycholic acid | Alanine aminotransferase, aspartate aminotransferase, gamma-glutamyl transferase, blood urea nitrogen, creatinine, uric acid, cholesterol (total, HDL, LDL), 131 metabolites measured (others NS) |
| Li, 2018<br>China [22]              | Nested case-control (UPLC-MS)               | 20 weeks GA                | Plasma (fasting)                  | 276/552 | IADPSG (dx at 24-32 week GA)                                    | TMAO, triglycerides                                                                                                                                                                                                                                                                                                                                                                                                                                                                                                                                                             | None                                                                                                                      | Cholesterol (total, HDL, LDL); no other metabolites measured                                                                                                                                      |
| Huo, 2019<br>China [23]             | Nested case-control (LC-MS)                 | first antenatal care visit | Plasma (fasting)                  | 243/243 | WHO-2013 criteria (dx at 24-28 weeks GA)                        | Alanine aminotransferase, trimethylamine                                                                                                                                                                                                                                                                                                                                                                                                                                                                                                                                        | Betaine, L-carnitine, choline chloride, trimethylamine N-oxide, deoxycholic acid, glycooursodeoxycholic acid              | None                                                                                                                                                                                              |
| Sakurai, 2019<br>Japan [24]         | Nested case-control (HICT-MS)               | <24 weeks GA               | Serum, Urine (unclear if fasting) | 121/121 | Medical records at time of delivery (but GDM dx at 24-28 weeks) | Serum: glutamine, pyrophosphate, octulose-1,8-bisphosphate Urine: shikimate-3-phosphate, ethanolamine, 1,3-diphosphateglycerate, leucine-isoleucine, p-hydroxybenzoate,                                                                                                                                                                                                                                                                                                                                                                                                         | None                                                                                                                      | 42 serum and 263 urine other metabolites measured (not NS)                                                                                                                                        |

|                       |                         |                    |                              |         |                                                        |                                                                                                                                                                                                                                                                                                                                                                                                                                                                                                              |                                                                                                                                                                                                                                               |                                                                |
|-----------------------|-------------------------|--------------------|------------------------------|---------|--------------------------------------------------------|--------------------------------------------------------------------------------------------------------------------------------------------------------------------------------------------------------------------------------------------------------------------------------------------------------------------------------------------------------------------------------------------------------------------------------------------------------------------------------------------------------------|-----------------------------------------------------------------------------------------------------------------------------------------------------------------------------------------------------------------------------------------------|----------------------------------------------------------------|
|                       |                         |                    |                              |         |                                                        | hydroxyphenylpyruvate, N-acetyl-alanine, hydroxyproline, octulose-monophosphate, N-acetyl-glucosamine, shikimate, cellobiose, threonine, methylcysteine, methionine sulfoxide, urea, deoxyribose-phosphate, methionine, acadesine, D-sedoheptulose-7-phosphate. Pathways: valine, leucine and isoleucine biosynthesis, ABC transporters, betaine-homocysteine S-methyltransferase, methionine synthases, aminoacyl-tRNA biosynthesis, phenylalanine, tyrosine and tryptophan biosynthesis, pentose phosphate |                                                                                                                                                                                                                                               |                                                                |
| Liu, 2019 China [25]  | Case-control (LC-MS)    | 6-8 weeks          | Urine (not clear if fasting) | 15/50   | IADPSG (dx at 24-28 weeks)                             | L-phenylalanyl-L-proline, hydroxy-lauroylcarnitine, levoglucosan, 1'-acetoxyeugenol acetate, 3,4-dimethyl-5-pentyl-2-furanundecanoic acid, polyethylene glycol, 6-hydroxy-5-methoxyindole glucuronide. Pathway: steroid hormone biosynthesis                                                                                                                                                                                                                                                                 | Pathway: tyrosine metabolism                                                                                                                                                                                                                  | Other metabolites measured (specific metabolites not outlined) |
| Zhao, 2019 China [26] | Case-control (UHPLC-MS) | Median 13 weeks GA | Serum (fasting)              | 107/107 | American Diabetes Association 2011 (dx at 24-28 weeks) | Hypoxanthine, xanthosine, glutamic acid, lysine, ornithine, proline, pantothenic acid, succinic acid semialdehyde, acetohydroxamic acid, glycerophosphocoline, taurine, creatine, acetylcarnitine, uracil, propionylcarnitine, aspartyl-isoleucine, pantothenic acid, 2 methylbutyrylcarnitine, LysoPC (14:0, 20:5, 16:1, 15:0, 22:6, 20:4, 20:3, 16:0,                                                                                                                                                      | Inosine, prolyhydroxyproline, threoninyl-phenylalanine, asparaginyl-tryptopham, phenylalanyl-gamma-glutamate, valyl-isoleucine, aspartyl-phenylalanine, phenylalanyl-valine, DL-2 -aminooctanoic acid, phenylalanyl-isoleucine, acetylglycine | Other metabolites measured (NS)                                |

|                                                                  |                                                                                                 |                |                               |         |                                                 |                                                                                                                                                                                                        |                                                                                                                                                                                                                 |                                                                                                                                                                |
|------------------------------------------------------------------|-------------------------------------------------------------------------------------------------|----------------|-------------------------------|---------|-------------------------------------------------|--------------------------------------------------------------------------------------------------------------------------------------------------------------------------------------------------------|-----------------------------------------------------------------------------------------------------------------------------------------------------------------------------------------------------------------|----------------------------------------------------------------------------------------------------------------------------------------------------------------|
|                                                                  |                                                                                                 |                |                               |         |                                                 | 20:3, 18:1, 17:1, 18:0, 22:4), palmitoylcarnitine, linoleoyl carnitine, histidine, succinic acid, malic acid, ascorbic acid-2-sulfate, glycocholic acid, chenodeoxycholic acid, lysophosphatidic acid  |                                                                                                                                                                                                                 |                                                                                                                                                                |
| Furse, 2020 UK (10% Black, 6% Asian, 68% White) [27]             | Cohort study (DI-MS/LC-MS)                                                                      | 15-18 weeks GA | Plasma (not clear if fasting) | 249/582 | IADPSG (dx 24-30 weeks GA)                      | Triglycerides (48:0, 50:1, 50:2, 51:5, 53:4), phosphatidylcholine (38:5)                                                                                                                               | Sphingomyelins (32:1, 41:2, 42:3), lyso-phosphatidylcholine (16:0, 18:1), phosphatidylcholines (35:2, 40:7, 40:10), polyunsaturated triglycerides (46:5, 48:6), oxidized triglycerides (48:6, 54:4, 56:4, 58:6) | 565 other triglyceride and phospholipid metabolites measured (specific metabolites not outlined)                                                               |
| Jiang, 2020 China [28]                                           | Cohort study (UHPLC-MS)                                                                         | 12-16 weeks GA | Serum (fasting)               | 65/366  | WHO-2013 criteria (dx at 24-28 weeks GA)        | Alanine, glutamate, isoleucine, phenylalanine, tyrosine, triglycerides                                                                                                                                 | None                                                                                                                                                                                                            | Arginine, asparaginase, aspartic acid, citrulline, glycine, hydroxyproline, leucine, valine, tryptophan, threonine, serine, proline, lysine, total cholesterol |
| Koos, 2020 US [29]                                               | Nested case-control (UPLC-MS, GC-MS)                                                            | 6-19 weeks GA  | Urine (not clear if fasting)  | 46/46   | American Diabetes Association 2017 (post urine) | Argininate, saccharopine, dihydroorotate, dopamine, isocitrate lactone, octanoylcarnitine, 3-methylglutarate or 2-methylglutarate, nicotinate ribonucleoside, 7,8-dihydroneopterin, phenol glucuronide | Lanthionine                                                                                                                                                                                                     | 626 total metabolites measured (others NS)                                                                                                                     |
| Li, 2020 China [30]                                              | Nested case-control (GC-MS)                                                                     | 10-16 weeks GA | Plasma (fasting)              | 305/305 | IADPSG (dx at 24-28 weeks)                      | Fatty acids (C20:5, C18:3, C18:1, C20:3, C16:1, C14:0, C16:0, C22:0)                                                                                                                                   | Fatty acids (C20:2, C22:4, C20:0, C24:0, C18:2)                                                                                                                                                                 | Fatty acids (C17:0, C18:3, C18:0, C22:5, C15:0, C20:4, C20:1, C22:3, C18:1, C22:6)                                                                             |
| <b>B. COLLECTED AFTER OR SAME TIME AS GDM DIAGNOSIS (N = 38)</b> |                                                                                                 |                |                               |         |                                                 |                                                                                                                                                                                                        |                                                                                                                                                                                                                 |                                                                                                                                                                |
| Butte, 1999 US (Mexican or Central American descent) [31]        | Case-control (amino acid analyser with 12cm high-performance sodium column with sodium buffers) | 32-36 weeks GA | Plasma (fasting)              | 8/8     | O'Sullivan and Mahan criteria                   | Taurine, hydroxyproline, glutamic acid, glutamine, cysteine, tyrosine, phenylalanine, tryptophan, histidine                                                                                            | N/A                                                                                                                                                                                                             | Threonine, serine, proline, glycine, alanine, valine, cystine, methionine, isoleucine, leucine, ornithine, lysine, arginine                                    |
| Seghieri, 2003 Italy [32]                                        | Case-control (targeted, fluorescence)                                                           | 24-28 weeks GA | Serum (unclear if fasting)    | 15/78   | Carpenter-Coustan criteria                      | Homocysteine                                                                                                                                                                                           | Vitamin B12                                                                                                                                                                                                     | Folate, uric acid, HDL, cholesterol, triacylglycerols, albumin                                                                                                 |



|                                             |                                                                 |                |                               |        |                                                             |                                                                                                                                                                            |                                                                                                                                                                                                         |                                                                                                                                                                                        |
|---------------------------------------------|-----------------------------------------------------------------|----------------|-------------------------------|--------|-------------------------------------------------------------|----------------------------------------------------------------------------------------------------------------------------------------------------------------------------|---------------------------------------------------------------------------------------------------------------------------------------------------------------------------------------------------------|----------------------------------------------------------------------------------------------------------------------------------------------------------------------------------------|
|                                             | polarisation immunoassay)                                       |                |                               |        |                                                             |                                                                                                                                                                            |                                                                                                                                                                                                         |                                                                                                                                                                                        |
| Tarim, 2004 Turkey [33]                     | (fluorescence polarisation immunoassay)                         | 24-28 weeks GA | Plasma (fasting)              | 28/210 | Carpenter–Coustan criteria                                  | None                                                                                                                                                                       | None                                                                                                                                                                                                    | Homocysteine, triglycerides, cholesterol (total, HDL, LDL), vitamin B12, folic acid, creatinine                                                                                        |
| Güven, 2006 Turkey [34]                     | Case-control (Immunolite 2000 assay)                            | 24-28 weeks GA | Serum (unclear)               | 30/147 | Carpenter–Coustan criteria                                  | Homocysteine                                                                                                                                                               | None                                                                                                                                                                                                    | Folate, vitamin B12                                                                                                                                                                    |
| Pappa, 2007 Greece [35]                     | Case-control (HPLC; enzymatic colorimetric assay)               | 30-33 weeks GA | Plasma (fasting)              | 25/46  | Fourth International Gestational Diabetes Workshop criteria | $\beta$ -hydroxybutyrate, free fatty acids                                                                                                                                 | Acylcarnitine, methionine, glycine, alanine, citrulline, ornithine                                                                                                                                      | Carnitine, histidine, isoleucine, leucine, lysine, phenylalanine, threonine, valine, arginine, aspartate, glutamate, serine, taurine, tyrosine, $\alpha$ -aminobutyric acid            |
| Idzior-Waluś, 2008 Poland [36]              | Case-control (ELISA-based assay)                                | 26-32 weeks GA | Serum (fasting)               | 44/17  | WHO criteria                                                | Triglycerides, NEFAs, fasting glucose                                                                                                                                      | None                                                                                                                                                                                                    | Homocysteine, HDL, LDL, cholesterol, insulin, folate, cystatin C, vitamin B12                                                                                                          |
| Telekjo, 2009 Poland [37]                   | Case-control (ELISA-based assay)                                | 24-32 weeks GA | Plasma (unclear if fasting)   | 56/68  | WHO criteria                                                | Cholesterol (total and HDL), triglycerides, endothelin-1                                                                                                                   | None                                                                                                                                                                                                    | HDL cholesterol, ADMA, E-selection, soluble vascular cell adhesion molecule-1                                                                                                          |
| Aktürk, 2010 Turkey [38]                    | Case-control (targeted, HPLC/fluorescence spectroscopy)         | 32-39 weeks GA | Plasma (fasting)              | 54/69  | Carpenter–Coustan criteria                                  | ADMA, triglycerides, HOMA-IR                                                                                                                                               | None                                                                                                                                                                                                    | Homocysteine, folic acid, vitamin B12                                                                                                                                                  |
| Sertkaya 2011 Turkey [39]                   | HPLC/fluorescence spectroscopy                                  | 24-28 weeks GA | Plasma (not clear if fasting) | 58/50  | Carpenter–Coustan criteria                                  | ADMA                                                                                                                                                                       | None                                                                                                                                                                                                    | None                                                                                                                                                                                   |
| Chen, 2010 US (45% Hispanic, 38% Black) [4] | Nested case-control (targeted on FA, GC-MS)                     | 28 weeks GA    | Serum (fasting)               | 49/98  | Carpenter–Coustan criteria                                  | Palmitic acid, palmitoleic acid, oleic acid, linoleic acid, linolenic acid, arachidonic acid, EPA, DHA                                                                     | None                                                                                                                                                                                                    | Myristic acid, stearic acid                                                                                                                                                            |
| Sachse, 2012 Norway [8]                     | Nested case-control (untargeted, $^1\text{H}$ NMR spectroscopy) | 26-30 weeks GA | Urine (fasting)               | 79/530 | WHO criteria                                                | Citrate                                                                                                                                                                    | None                                                                                                                                                                                                    | See section a. above (Sachse, 2012)                                                                                                                                                    |
| Dudzik, 2014 & Lorenzo, 2015 Poland [40-41] | Case-control (untargeted, GC-MS/LC-MS/CE-MS)                    | 22-28 weeks GA | Plasma and urine (fasting)    | 20/20  | WHO-1998                                                    | Plasma: phosphatidylethanolamines (38:6, 36:5), Phosphatidylcholines (38:1, 40:3), acetylcarnitine, linoleic acid, glycerol, 3-hydroxybutyrate, 2-hydroxybutyrate, fumaric | Plasma: LPE (16:0, 18:0, 18:2, 20:0, 20:1, 20:2, 22:4, 22:6), LPC (16:0; 18:0, 18:1, 18:2, 18:3, 20:3, 20:4, 20:5 acyl chains), LPI (20:4), LPS (20:0), LPA (18:2), lipoxin C4, trihydroxy-cholestanoyl | Alanine, valine, threonine, norleucine, proline, isoleucine, serine, leucine, cysteine, aspartic acid, methionine tyrosine, ornithine, lysine, arginine, histidine, methionine sulfone |

|                                      |                                                                 |                |                             |       |                                        |                                                                                                                                                                                                                                                                                                                   |                                                                                                                                                                                                |                                                                                                                                                                                                                                                                                                                                                                                                       |
|--------------------------------------|-----------------------------------------------------------------|----------------|-----------------------------|-------|----------------------------------------|-------------------------------------------------------------------------------------------------------------------------------------------------------------------------------------------------------------------------------------------------------------------------------------------------------------------|------------------------------------------------------------------------------------------------------------------------------------------------------------------------------------------------|-------------------------------------------------------------------------------------------------------------------------------------------------------------------------------------------------------------------------------------------------------------------------------------------------------------------------------------------------------------------------------------------------------|
|                                      |                                                                 |                |                             |       |                                        | acid<br>Urine: histidine, glutamine, phenylalanine, tryptophan, cystine                                                                                                                                                                                                                                           | taurine, tauroolithocholic acid glucuronide, araquidonate, DHA methyl esters, glycerol-phosphocholine, creatinine, pyruvic acid, glycine, glutamate, tryptophan, lauric acid; Urine: carnitine |                                                                                                                                                                                                                                                                                                                                                                                                       |
| Prentice, 2014 US [42]               | Case-control (untargeted GC-MS/LC-MS)                           | 24–28 weeks GA | Plasma (fasting)            | 24/24 | NIH                                    | 3-carboxy-4-methyl-5-propyl-2-furanpropanoic acid                                                                                                                                                                                                                                                                 | Did not measure other metabolites                                                                                                                                                              |                                                                                                                                                                                                                                                                                                                                                                                                       |
| Scholtens, 2014 Northern Europe [43] | Case-control (targeted on amino acids and untargeted, MS/GC-MS) | 24–32 weeks GA | Serum (fasting)             | 67/50 | IADPSG                                 | Alanine, proline, leucine, isoleucine, valine, arginine, phenylalanine, lactate, palmitic acid, lauric acid, heptadecanoic acid, $\beta$ -tocopherol, $\beta$ -hydroxybutyric acid, acetoacetic acid, pyruvic acid, $\alpha$ -ketoglutaric acid, 2-hydroxybutyric acid, isocitric acid, creatinine, triglycerides | 1,5-Anhydroglucitol, mannitol and other hexitols, $\beta$ -sitosterol                                                                                                                          | Glycerol, citrulline, valine, tyrosine, ornithine, histidine, serine, methionine, glycine                                                                                                                                                                                                                                                                                                             |
| Hajduk, 2015 Poland [44]             | Case-control (targeted on amino acids, LC-MS)                   | 24–28 weeks GA | Plasma (unclear if fasting) | 18/13 | Polish Gynecological Society Standards | L-Citrulline                                                                                                                                                                                                                                                                                                      | L-Asparagine, L-valine, and L-ornithine                                                                                                                                                        | Other amino acids measured (specific metabolites not outlined)                                                                                                                                                                                                                                                                                                                                        |
| He, 2016 China [45]                  | Case-control (untargeted, GC-MS)                                | 24–28 weeks GA | Hair                        | 47/47 | IADPSG                                 | Adipic acid                                                                                                                                                                                                                                                                                                       |                                                                                                                                                                                                | 2-oxobutyric acid, glycine, proline, 2-oxoglutaric acid, lactic acid, pyroglutamic acid, leucine, pyruvic acid, alanine, malonic acid, quinic acid, aspartic acid, methionine, serine, citramalic acid, n-acetylglutamic acid, stearic acid, citric acid, octanoic acid, succinic acid, cysteine, oxalic acid, threonine, fumaric acid, palmitic acid, tyrosine, valine, glutamic acid, phenylalanine |
| Lehmann, 2015 Germany [46]           | Case-control (targeted, GC-MS/LC-MS)                            | 24–27 weeks GA | Plasma (fasting)            | 9/15  | IADPSG                                 | Acetylcarnitine, leucine, oleate, triglycerides                                                                                                                                                                                                                                                                   | glycerophospholipids [diacyl-phosphatidylcholine (PC aa) C38:6, PC aa C40:0, PC aa C42:0, PC aa C42:1, glycine, LPC (26:1, 28:1), fatty acids (C22:4, C22:5)                                   | Creatinine, cholesterol (total, HDL, LDL), C-reactive protein<br>231 metabolites measured (specific metabolites not outlined)                                                                                                                                                                                                                                                                         |
| Gao, 2016 China [47]                 | Case-control (targeted on                                       | ~28 weeks GA   | Serum (fasting)             | 38/27 | IADPSG                                 | $\beta$ -muricholic acid, glycohyo-deoxycholic acid,                                                                                                                                                                                                                                                              | None                                                                                                                                                                                           |                                                                                                                                                                                                                                                                                                                                                                                                       |

|                                           |                                         |                        |                              |       |                            |                                                                                                                                                                                                                                                                                                                                                                                                                                                                               |                                                                                                                                                                                                                                                                             |                                                                |
|-------------------------------------------|-----------------------------------------|------------------------|------------------------------|-------|----------------------------|-------------------------------------------------------------------------------------------------------------------------------------------------------------------------------------------------------------------------------------------------------------------------------------------------------------------------------------------------------------------------------------------------------------------------------------------------------------------------------|-----------------------------------------------------------------------------------------------------------------------------------------------------------------------------------------------------------------------------------------------------------------------------|----------------------------------------------------------------|
|                                           | bile acid, LC-MS)                       |                        |                              |       |                            | taurohyo-deoxycholic acid, 5 sulfated (dehydro-1S, mono-2S+ mono-3S, mono-4S, and mono-5S)                                                                                                                                                                                                                                                                                                                                                                                    |                                                                                                                                                                                                                                                                             |                                                                |
| Liu, 2016 China [48]                      | Nested case-control (untargeted, LC-MS) | 28-36 weeks GA         | Serum (fasting)              | 12/10 | IADPSG                     | 1-Methyladenosine, homovanillic acid, trans-3-octenedioic acid, glucosamine, LPC (16:1, 20:2), 3-methylthiopropionic acid, L-lactic acid, tyrosine, L-2-hydroxyglutaric acid, phosphorylcholine                                                                                                                                                                                                                                                                               | Gluconolactone, serinyl-glycine, LPC (20:4), 3-methylhistidine, 2-oxo-4-methylthiobutanoic acid, sphingomyelin (d18:0/18:0), arabinonic acid indoleacetaldehyde, LPE (14:1/ 20:0), 3-oxooctadecanoic acid, glycine, pyridoxal, capric acid, stearic acid, 3-methylhistidine | Other metabolites measured (specific metabolites not outlined) |
| Law, 2017 China part 1 and part 2 [12-13] | Nested case-control (untargeted, LC-MS) | 23-27 & 29-33 weeks GA | Plasma (fasting)             | 27/34 | IADPSG                     | Prostanoic acid, sesaminol 2-O-triglucoside, tricrin 7-neohesperidoside, and dihydro-12-oxo-15-phytoenoic acid. Pathways: tryptophan metabolism (e.g. oxitriptan (5-hydroxytryptamine), serotonin), purine nucleosides (e.g. uridine, hypoxanthine, xanthine, xanthosine), amino acid derivatives (e.g. homocitrulline), steroid and sterol conjugates (e.g. 5-androstenediol), fatty acid derivates (e.g. 3-hydroxybutyric acid), carnitines, amino acids (e.g. D-galactose) | (2E)-14- hydroxytetradec-2-enoic acid, (2E,13R)-13-hydroxytetradec-2-enoic acid, 2,15-dihydroxypentadecanoic acid, (7R,8S,9Z,12Z,15Z)-7,8-dihydroxy-9,12,15-octadecatrienoic acid, 11 $\alpha$ ,20,26-trihydroxyecdysone                                                    | 183 other metabolites measured (others NS)                     |
| Leitner, 2017 Italy [14]                  | Case-control (GC-MS)                    | 12-26 weeks GA         | Urine (not clear if fasting) | 14/18 | IADPSG (dx at 24-28 weeks) | 2-hydroxybutanoic acid, 3-hydroxybutanoic acid, valine, alanine, beta-alanine, tryptophan, b-sitosterol, octadecadienoic acid, tyrosine, leucine, phenylalanine, 2,4-dihydroxybutyrate, citrate, malate, succinate, uracil, lactate, pentahydroxyhexanoic acid                                                                                                                                                                                                                | None                                                                                                                                                                                                                                                                        | Other metabolites measured (specific metabolites not outlined) |

|                                                                                                                      |                                      |                   |                             |              |                                                                                                |                                                                                                                                                           |                                                                                                                                                                                            |                                                                                                                                                    |
|----------------------------------------------------------------------------------------------------------------------|--------------------------------------|-------------------|-----------------------------|--------------|------------------------------------------------------------------------------------------------|-----------------------------------------------------------------------------------------------------------------------------------------------------------|--------------------------------------------------------------------------------------------------------------------------------------------------------------------------------------------|----------------------------------------------------------------------------------------------------------------------------------------------------|
| Zhang, 2017<br>China [15]                                                                                            | Cohort study<br>(HILIC-MS)           | 9-12<br>weeks GA  | Serum<br>(fasting)          | 533/<br>5175 | IADPSG<br>(dx at 24-28<br>weeks)                                                               |                                                                                                                                                           | Thyroxin                                                                                                                                                                                   | No other metabolites measured                                                                                                                      |
| Barzilay<br>2018,<br>Canada<br>(45%<br>European,<br>25% Asian,<br>9% Latin,<br>7% Black)<br>[16]                     | Nested case-<br>control (LC-<br>MS)  | 12-16<br>weeks GA | Plasma<br>(non-<br>fasting) | 18/296       | Canadian<br>Diabetes<br>Association<br>2008<br>practice<br>guideline<br>(dx 24-28<br>weeks GA) | None                                                                                                                                                      | None                                                                                                                                                                                       | Pyridoxal 5' phosphate, choline,<br>dimethylglycine, betaine, trimethylamine N-<br>oxide, homocysteine, folic acid                                 |
| Chorell,<br>2017<br>Sweden<br>[49]                                                                                   | Case-control<br>(GC-<br>TOF/MS)      | 27-38<br>weeks GA | Serum<br>(fasting)          | 11/24        | European<br>Association<br>for the<br>Study of<br>Diabetes<br>1991<br>criteria                 | None                                                                                                                                                      | Cholesterol, LDL                                                                                                                                                                           | 120 metabolites (e.g. leucine, isoleucine,<br>valine, HDL cholesterol) NS                                                                          |
| Dudzik,<br>2017 Poland<br>[40]                                                                                       | Nested case-<br>control (GC-<br>MS)  | 22-28<br>weeks GA | Plasma<br>(fasting)         | 24/24        | WHO-1998<br>criteria                                                                           | 2- and 3-hydroxybutyrate,<br>linoleic acid, oleic acid,<br>palmitoleic acid, palmitic<br>acid, glycerol, triglycerides,                                   | None                                                                                                                                                                                       | Other metabolites measured (specific<br>metabolites not outlined), cholesterol (total,<br>HDL, LDL)                                                |
| Rahimi,<br>2017 Iran<br>[50]                                                                                         | Case-control<br>(HPLC)               | >25<br>weeks GA   | Plasma<br>(fasting)         | 27/25        | American<br>Diabetes<br>Association<br>2015<br>criteria (dx<br>at 24-28<br>weeks GA)           | Asparagine, aspartate,<br>threonine, phenylalanine,<br>glutamine, arginine                                                                                | None                                                                                                                                                                                       | Histidine, serine, glutamate, citrulline,<br>glycine, leucine, lysine, isoleucine, leucine,<br>ornithine, tyrosine, tryptophan, valine,<br>alanine |
| Delplancke,<br>2018 New<br>Zealand<br>(18%<br>Indian/<br>Asian, 63%<br>European,<br>18% Pacific<br>Islander)<br>[51] | Case-control<br>(GC-MS/LC-<br>MS)    | 34-37<br>weeks GA | Hair                        | 11/73        | IADPSG                                                                                         | 1-hydroxy-3-nonanone, 22-<br>oxavitamin D3                                                                                                                | Tryptophan, leucine, citric<br>acid, 3,4-<br>oxazolidinecarboxylic acid,<br>2-oxoaleric acid, 3-<br>pyridinecarboxamide, 2-<br>methylpentan-2-y<br>trifluoroacetate, 2-<br>oxobutyric acid | 980 total metabolites measured (others NS)                                                                                                         |
| Batchuluun,<br>2018<br>Canada<br>(28%<br>White, 8%<br>Black, 26%<br>Asian, 35%)                                      | Nested case-<br>control (SRM-<br>MS) | 24-28<br>weeks GA | Plasma<br>(fasting)         | 13/11        | Carpenter-<br>Coustan<br>criteria                                                              | Short chain acylcarnitines,<br>medium chain<br>acylcarnitines (hexanoyl-<br>carnitine, octanoyl-<br>carnitine, decanoyl-<br>carnitine, lauroyl-carnitine) | None                                                                                                                                                                                       | Long chain acylcarnitines (C14, C16, C18)                                                                                                          |

|                                       |                            |                |                                 |       |                                                                         |                                                                                                                                                                                                                                                                                                                                                                                                                                                               |                                                                                                                                |                                                                                                                                                                           |
|---------------------------------------|----------------------------|----------------|---------------------------------|-------|-------------------------------------------------------------------------|---------------------------------------------------------------------------------------------------------------------------------------------------------------------------------------------------------------------------------------------------------------------------------------------------------------------------------------------------------------------------------------------------------------------------------------------------------------|--------------------------------------------------------------------------------------------------------------------------------|---------------------------------------------------------------------------------------------------------------------------------------------------------------------------|
| Hispanic) [52]                        |                            |                |                                 |       |                                                                         |                                                                                                                                                                                                                                                                                                                                                                                                                                                               |                                                                                                                                |                                                                                                                                                                           |
| Bukowiecka-Matusiak, 2018 Poland [53] | Case-control (GC-MS)       | 24-28 weeks GA | Plasma (fasting)                | 32/11 | WHO-2013 criteria                                                       | Vaccenic acid                                                                                                                                                                                                                                                                                                                                                                                                                                                 | Stearic acid                                                                                                                   | Fatty acids (myristic, palmitic, sapienic, palmitoleic, oleic, linoleic, alpha-linolenic, gamma-linolenic, arachidonic, EPA, DPA, DHA)                                    |
| Chen, 2018 China [54]                 | Case-control (GC-MS/LC-MS) | 26-28 weeks GA | Urine and serum (fasting), hair | 49/44 | IADPSG                                                                  | Serum: 2-aminobutyric acid                                                                                                                                                                                                                                                                                                                                                                                                                                    | None                                                                                                                           | Other metabolites measured (232 metabolites in urine, 96 metabolites in serum, 160 metabolites in hair; specific metabolites not outlined), adjusted for multiple testing |
| Li, 2019 China [55]                   | Case-control (LC-MS)       | 24-28 weeks GA | Serum (not clear if fasting)    | 30/30 | IADPSG                                                                  | Tetrahydrocortisol, ruminic, linoleic acid, lysoPC, psychosine, traumatic acid, prostaglandin c2, prostaglandin j2, prostaglandin b2, prostaglandin a2, urocortisone, corticosterone, 11-deoxycortisol, thromboxane b2, prostaglandin d2-d4, prostaglandin e2-d4, oleic acid, 2-hydroxyestrone, dehydroepiandrosterone, 2s-hydroxybutanoic, d(-)-beta-hydroxy, 4-hydroxybutyric, crotonoyl-coa, methacrylyl-coa, lysophosphatidic acid, pravastatin, THB, DPA | Lutein, zeaxanthin, lathosterol, prostaglandin-endoperoxide synthase 2, 6-keto prostaglandin E1, coenzyme Q10, HDL cholesterol | Triglyceride, other metabolites measured (specific metabolites not outlined)                                                                                              |
| López-Hernández, 2019 Mexico [56]     | Case-control (UPLC-MS)     | >24 weeks      | Urine (not clear if fasting)    | 24/11 | American College of Obstetricians and Gynecologists (dx at 24-28 weeks) | 5-carboxy-alpha-chromanol, aspartame, DG (24:0/14:1), tryptophan L-urobilinogen, cer (d18:0/23:0), SM (d18:0/22:0), steroids/derivatives (11-oxo-androsterone-glucuronide, cortolone-3-glucuronide, tetrahydroaldosterone-3-glucuronide, 5-androstene-3b,16b,17a-triol, 21-deoxycortisol, 11b, 17a,21-trihydroxypreg-nonolone, cucurbitacin c), creatinine,                                                                                                   | None                                                                                                                           | Other metabolites measured (4598 features detected, specific metabolites not outlined)                                                                                    |

|                                                                          |                                    |                         |                                       |          |                                                        |                                                                                                                                                                                                                                                            |                                                                                                                                                                                                                 |                                                                                                                                                                                                                                                                                                                              |
|--------------------------------------------------------------------------|------------------------------------|-------------------------|---------------------------------------|----------|--------------------------------------------------------|------------------------------------------------------------------------------------------------------------------------------------------------------------------------------------------------------------------------------------------------------------|-----------------------------------------------------------------------------------------------------------------------------------------------------------------------------------------------------------------|------------------------------------------------------------------------------------------------------------------------------------------------------------------------------------------------------------------------------------------------------------------------------------------------------------------------------|
|                                                                          |                                    |                         |                                       |          |                                                        | urea. Pathways: tryptophan metabolism, steroid hormone biosynthesis                                                                                                                                                                                        |                                                                                                                                                                                                                 |                                                                                                                                                                                                                                                                                                                              |
| Taylor et al., 2019 United Kingdom (54% South Asian; 46% White) [57]     | Case-control (targeted NMR)        | 92% between 26-28 weeks | Serum (fasting)                       | 734/8774 | WHO criteria (dx at 24-28 weeks)                       | vLDL, small HDL, triglycerides (HDL and LDL), total fatty acids, SFAs, glucose, lactic acid, pyruvic acid, citric acid, glycerol, alanine, phenylalanine, tyrosine, 3-hydroxybutyric acid, BCAAs, acetate, glycoprotein acetyls                            | Glutamine                                                                                                                                                                                                       | LDL, medium and large HDL, total cholesterol, choline, phosphatidylcholine, ApoA, ApoB, histidine, glycine, creatinine, albumin                                                                                                                                                                                              |
| He, 2020 China [58]                                                      | Cohort study (GC-MS)               | 3rd trimester GA        | Plasma (fasting)                      | 177/387  | IADPSG (dx at 24-28 weeks)                             | Triglycerides                                                                                                                                                                                                                                              | None                                                                                                                                                                                                            | Serum fatty acids (All PUFAs, MUFAs, SFA), cholesterol (total, HDL, LDL)                                                                                                                                                                                                                                                     |
| Zhao, 2019 China [26]                                                    | Case-control (UHPLC-MS)            | Median 26 weeks GA      | Serum (fasting)                       | 107/107  | American Diabetes Association 2011 (dx at 24-28 weeks) | Guanosine, glutamic acid, acetylcarnitine, propionylcarnitine, 2-Octenoylcarnitine, LysoPC (14:0, 16:1, 20:3, 16:0 17:0), palmitoylcarnitine, lysophosphatidic Acid                                                                                        | Threoninyl-Phenylalanine, Phenylalanyl-Gamma-glutamate, Phenylalanyl-Isoleucine                                                                                                                                 | Other metabolites measured (NS)                                                                                                                                                                                                                                                                                              |
| Burzynska-Pedziwiat, 2020 Poland [59]                                    | Case-control (HPLC-MS/MS)          | 24-28 weeks GA          | Plasma (fasting)                      | 29/35    | WHO-2013 criteria                                      | None                                                                                                                                                                                                                                                       | Arginine, glutamine, histidine, methionine, phenylalanine, serine                                                                                                                                               | Alanine, asparagine, glutamic acid, glycine, isoleucine, leucine, lysine, proline, threonine, tryptophan, tyrosine, valine, cholesterol (total, HDL, LDL), C-reactive protein, triglycerides                                                                                                                                 |
| Walejko, 2020 Florida (59% White, 29% Black, 7% Asian, 6% Hispanic) [60] | Case-control (1H NMR spectroscopy) | 1st, 2nd, 3rd trimester | Plasma (both fasting and non-fasting) | 12/57    | Not clear                                              | (CH <sub>2</sub> n) fatty acids, ch <sub>2</sub> ch=c fatty acids, alpha-ch <sub>2</sub> fatty acids, glyceryl c1, 3h, glyceryl c2h, ch=ch fatty acids, n-acetyl-glycoproteins. Pathways: butanoate metabolism, synthesis and degradation of ketone bodies | Glutamine, glycine, serine, threonine, succinate, acetate, creatinine, formate. Pathways: glyoxylate and dicarboxylate, glycine, serine, and threonine, alanine, aspartate and glutamine metabolism             | Alanine, arginine, asparagine, leucine, isoleucine, valine, dimethylglycine, glutamate, histidine, methionine, lysine, ornithine, dimethylsulfone, phenylalanine, proline, citrate, lactate, pyruvate, acetoacetate, acetone, 3-hydroxybutyrate, betaine, choline, glycolipids, creatine, 2-oxoisovalerate, tyrosine, valine |
| Wang, 2020 China [61]                                                    | Case-control (GC-MS)               | Unclear                 | Urine (not clear if fasting)          | 59/48    | IADPSG (dx at 24-28 weeks)                             | D-galactose, 2-methoxytyrosine                                                                                                                                                                                                                             | 2-o-methyl-l-ascorbic acid, citraconic acid, N-methylglutamic acid, cysteine-glycine, glutamine, glycine, galactitol, trehalose, isocitric acid, 2-hydroxyhexanoic acid, nicotinic acid, 2-dehydroshikimic acid | Other metabolites measured (specific metabolites not outlined)                                                                                                                                                                                                                                                               |
| Tan, 2020                                                                | Case-control                       | post GDM                | Serum                                 | 29/29    | WHO-2013                                               | LPC (18:0, 16:0), palmitic                                                                                                                                                                                                                                 | LPC (22:6), behenic acid,                                                                                                                                                                                       | 14-Methyl hexadecenoic acid, other                                                                                                                                                                                                                                                                                           |

|                                                                                      |                                                                                                 |                                           |                             |        |                               |                                                                                                                                                                                                                                                                                                                                                                                                                                                                                                                                       |                                                                                                                                                                                                                                                                                                                                                                                                                                                                                                                               |                                                                                                                                                                                |
|--------------------------------------------------------------------------------------|-------------------------------------------------------------------------------------------------|-------------------------------------------|-----------------------------|--------|-------------------------------|---------------------------------------------------------------------------------------------------------------------------------------------------------------------------------------------------------------------------------------------------------------------------------------------------------------------------------------------------------------------------------------------------------------------------------------------------------------------------------------------------------------------------------------|-------------------------------------------------------------------------------------------------------------------------------------------------------------------------------------------------------------------------------------------------------------------------------------------------------------------------------------------------------------------------------------------------------------------------------------------------------------------------------------------------------------------------------|--------------------------------------------------------------------------------------------------------------------------------------------------------------------------------|
| China [62]                                                                           | (UHPLC-MS)                                                                                      | dx (week not recorded)                    | (fasting)                   |        | criteria                      | acid, phytosphingosine                                                                                                                                                                                                                                                                                                                                                                                                                                                                                                                | sphingosine, 1,25-dihydroxyvitamin D3-26,23-lactone                                                                                                                                                                                                                                                                                                                                                                                                                                                                           | metabolites measured (specific metabolites not mentioned)                                                                                                                      |
| <b>C. COLLECTED DURING DELIVERY OR POSTPARTUM (&lt; 2 YEARS POSTPARTUM) (N = 11)</b> |                                                                                                 |                                           |                             |        |                               |                                                                                                                                                                                                                                                                                                                                                                                                                                                                                                                                       |                                                                                                                                                                                                                                                                                                                                                                                                                                                                                                                               |                                                                                                                                                                                |
| Butte, 1999 US (Mexican or Central American descent) [31]                            | Case-control (amino acid analyser with 12cm high-performance sodium column with sodium buffers) | 6 weeks PP                                | Plasma (fasting)            | 8/8    | O'Sullivan and Mahan criteria | Taurine, hydroxyproline, glutamic acid, glutamine, cysteine, tyrosine, phenylalanine, tryptophan, histidine, proline, valine, isoleucine, leucine, lysine, arginine                                                                                                                                                                                                                                                                                                                                                                   | None                                                                                                                                                                                                                                                                                                                                                                                                                                                                                                                          | Threonine, serine, glycine, alanine, cystine, methionine, ornithine                                                                                                            |
| Cetin, 2005 Italy [63]                                                               | Case-control (HPLC/ dual wavelength spectrophotometry)                                          | During delivery; GDM gx at 37-41 weeks GA | Plasma (likely non-fasting) | 17/16  | Carpenter-Coustan criteria    | Ornithine                                                                                                                                                                                                                                                                                                                                                                                                                                                                                                                             | None                                                                                                                                                                                                                                                                                                                                                                                                                                                                                                                          | Lysine, histidine, threonine, valine, methionine, isoleucine, leucine, phenylalanine, proline, arginine, taurine, serine, glutamic acid, glutamine, glycine, alanine, tyrosine |
| Sachse, 2012 Norway [8]                                                              | Nested case-control (untargeted, <sup>1</sup> H NMR spectroscopy)                               | 10-16 weeks PP                            | Urine (fasting)             | 79/530 | WHO                           | None                                                                                                                                                                                                                                                                                                                                                                                                                                                                                                                                  | None                                                                                                                                                                                                                                                                                                                                                                                                                                                                                                                          | See section a. above (Sachse, 2012)                                                                                                                                            |
| Anderson, 2014 UK (70% European, 25% South Asian) [64]                               | Case-control (untargeted, LCMS)                                                                 | 22 months PP                              | Serum (fasting)             | 18/43  | WHO                           | Phospholipids (20:1, 18:1, 37:0), oxodecenoic acid, decanol, nonadienoic acid, elaidoylamide, octenedioic acid, hydroxydodecanoic acid, hydroxyadipic acid, 8-amino-7-oxononanoate, oxobutanoic acid, octanoic acid, oxopentanoic acid, oxo-hydroxy-aminovaleric acid, itaconic acid, hydroxymethyl-pentanoic acid, 5beta-choleane-3alpha-24-diol, pgf2alpha-11-acetate, 11alpha-hydroxy-9,15-dioxoprost-13-enoate, 3alpha,11beta,17alpha-trihydroxy-5beta-pregnan-20-one, uric acid, proline, leucine, isoleucine, dimethyluric acid | Phospholipids (10:1, 36:3, 34:0, 38:9, 16:2, 18:1), tetradecenoic acid, decadienoic acid, hydroxydodecanoic acid, hydroxyoctadecanoic acid, docosanol, hydroxypyruvic acid, acetic acid, methylmalonic acid semialdehyde, propanoic acid, 2-amino-3-phosphonopropanoic acid, methylvaleric acid, diglycerides (40:1), chenodeoxycholic acid 3-sulphate, 4alpha,24beta-dimethyl-5alpha-cholest-22-en-3beta-4beta-diol, 4alpha-hydroxymethyl-4beta-methyl-5alpha-cholesta-8-en-3beta-ol, n-(aminomethyl)urea, phosphoshikimate, | None                                                                                                                                                                           |

|                                                                          |                                                                            |                              |                                      |        |                                                                        |                                                                                                                                                               |                                                                                                              |                                                                                                                                                                                                                                                                                                                         |
|--------------------------------------------------------------------------|----------------------------------------------------------------------------|------------------------------|--------------------------------------|--------|------------------------------------------------------------------------|---------------------------------------------------------------------------------------------------------------------------------------------------------------|--------------------------------------------------------------------------------------------------------------|-------------------------------------------------------------------------------------------------------------------------------------------------------------------------------------------------------------------------------------------------------------------------------------------------------------------------|
|                                                                          |                                                                            |                              |                                      |        |                                                                        |                                                                                                                                                               | tryptophan, 2-polyprenylphenol, benzosemiquinone, 2-hexaprenylphenol, 5,6,7,8-tetrahydrofolate               |                                                                                                                                                                                                                                                                                                                         |
| Liu, 2016 China [48]                                                     | Nested Case-control (untargeted, LCMS)                                     | Within 3 days PP             | Serum (fasting)                      | 12/10  | IADPSG                                                                 | L-Carnitine, creatine                                                                                                                                         | L-lysine, vitamin A, LPE (22:6), ribothymidine, corticosterone, , 17-hydroxyprogesterone, 1, 4-beta-D-glucan | Other metabolites measured (specific metabolites not outlined)                                                                                                                                                                                                                                                          |
| Chertok, 2017 Israel [65]                                                | Case-control (chromatograph equipped with a fused-silica capillary column) | first 5 days PP              | Colostrum (not mentioned if fasting) | 29/34  | Hospital records                                                       | Arachidonic acid, docosatetraenoic acid, linoleic acid, eicosatrienoic acid, heptadecanoic acid                                                               | Pentadecanoic acid                                                                                           | Fatty acids (palmitic, lignoceric, oleic, myristic, vaccenic, myristoleic, cis-10-pentadecanoic, margaric, docosanoic, dh, lauric, gondoic, nervonic, epa, erucic, eicosadienoic, tridecylic, linoleic, stearic, arachidic, heneicosylic, clupanodonic, y-linolenic, a-linolenic, trans-oleic, tricosylic, palmitoleic) |
| Dudzik, 2017 Poland [40]                                                 | Nested case-control (GC-MS)                                                | 4 weeks and 12 weeks PP      | Plasma (fasting)                     | 24/24  | WHO-1998 criteria                                                      | 1 month PP: lactic acid, proline<br>3 months PP: 2- and 3-hydroxybutyrate, gluconic acid, palmitic acid, linoleic acid, oleic acid, glycerol, C-peptide       | 2-ketoisocaproic acid                                                                                        | Other metabolites measured (specific metabolites not outlined), cholesterol (total, HDL, LDL)                                                                                                                                                                                                                           |
| Chorell, 2017 Sweden [49]                                                | Case-control (GC-TOF/MS)                                                   | 6-12 months PP               | Serum (fasting)                      | 11/24  | European Association for the Study of Diabetes 1991 criteria           | leucine, isoleucine, valine                                                                                                                                   | DHA, palmitic acid, linoleic acid, elaidic acid, oleic acid                                                  | Cholesterol (total, HDL, LDL), 112 metabolites analyzed NS                                                                                                                                                                                                                                                              |
| Barzilay 2018, Canada (45% European, 25% Asian, 9% Latin, 7% Black) [16] | Nested case-control (LC-MS)                                                | At delivery (37-42 weeks GA) | Plasma (non-fasting)                 | 18/296 | Canadian Diabetes Association 2008 practice guideline (24-28 weeks GA) | None                                                                                                                                                          | None                                                                                                         | Pyridoxal 5' phosphate, choline, dimethylglycine, betaine, trimethylamine N-oxide, homocysteine, folic acid                                                                                                                                                                                                             |
| Lu, 2018 Germany [66]                                                    | (FIA-ESI-MS/MS)                                                            | Time of birth                | Serum                                | 31/381 | German Diabetes Association and German Association for                 | acylcarnitine (C4:1), diacylphosphatidyl-cholines (PC cc 36:5, PC aa C36:6), acyl-alkyl-phosphatidyl-cholines (Pc ae C38:0, 38:3, 40:1, 40:5), sum of hexoses | None                                                                                                         | 163 total metabolites measured: 40 acylcarnitines, 14 amino acids, hexoses, 92 glycerophospholipids (15 LPCs and 77 phosphatidylcholines), and 15 sphingolipids [NS]                                                                                                                                                    |



|                          |                             |    |          |         |                                       |          |                               |  |
|--------------------------|-----------------------------|----|----------|---------|---------------------------------------|----------|-------------------------------|--|
|                          |                             |    |          |         | Gynecology and Obstetrics             |          |                               |  |
| Chu, 2020 Singapore [67] | Nested case-control (LC-MS) | PP | Placenta | 154/845 | WHO-1999 criteria (dx at 26 weeks GA) | Inositol | No other metabolites measured |  |

\* Same study population, but different bio-specimens (counted as 1 study).

Abbreviations: GA = gestational age; PP = post partum; NS = not significant; US = United States of America; IADPSG = International Association of Diabetes and Pregnancy Study Groups; WHO = World Health Organization; GC-MS = gas chromatography/mass spectrometry; LC-MS = liquid chromatography/mass spectrometry; CE-MS = capillary electrophoresis/mass spectrometry; UPLC-MS = ultra-performance liquid chromatography–mass spectrometry; UHPLC-MS = ultra-high-performance liquid chromatography–mass spectrometry; HPLC = High-performance liquid chromatography; <sup>1</sup>H NMR = high resolution proton nuclear magnetic resonance; SRM-MS = semiquantitative selected reaction monitoring mass spectroscopy; HPLC–MS/MS = high pressure liquid chromatography coupled with triple quadrupole tandem mass spectrometry; FIA–ESI–MS/MS = flow injection analysis–electrospray ionization– tandem mass spectrometry; LCQ-TOF-MS = liquid chromatography coupled with quadrupole time-of-flight mass spectrometry; GC-TOF/MS = gas chromatography–time-of-flight mass spectrometry; DI-MS = direct infusion mass spectrometry; UPLC-TQ-MS = ultra-performance liquid chromatography coupled with tandem quadrupole mass spectrometry; UHRQ-TOF-MS = ultra-high resolution quadrupole time-of-flight mass spectrometry; HICT-MS = hydrophilic interaction chromatography tandem mass spectrometry; HILIC-MS = hydrophilic interaction liquid chromatography coupled with tandem mass-spectrometry; SFAs = saturated fatty acids; NEFAs = non-esterified fatty acids.

**Supplemental Table S2.****Key characteristics of studies up to November 2020 investigating metabolites associated with GDM (n = 61 studies)**

| Characteristic                                                                   | N studies (%) | Range in # of GDM cases |
|----------------------------------------------------------------------------------|---------------|-------------------------|
| <b>GDM cases</b>                                                                 |               |                         |
| Conducted using < 80 GDM cases                                                   | 48 (78.7)     | 8-80                    |
| <b>Country</b>                                                                   |               |                         |
| China                                                                            | 18 (30.0)     | 12-533                  |
| Japan                                                                            | 1 (1.6)       | 121                     |
| Singapore                                                                        | 1 (1.6)       | 154                     |
| New Zealand                                                                      | 2 (3.3)       | 11-22                   |
| United States                                                                    | 7 (11.5)      | 8-96                    |
| Mexico                                                                           | 1 (1.6)       | 24                      |
| Canada                                                                           | 3 (5.0)       | 13-50                   |
| United Kingdom                                                                   | 3 (5.0)       | 18-8774                 |
| Poland                                                                           | 7 (11.5)      | 18-56                   |
| Germany                                                                          | 2 (3.3)       | 9-31                    |
| Italy                                                                            | 3 (5.0)       | 14-17                   |
| Portugal                                                                         | 3 (5.0)       | 23-42                   |
| Sweden                                                                           | 1 (1.6)       | 11                      |
| Norway                                                                           | 1 (1.6)       | 79                      |
| Greece                                                                           | 1 (1.6)       | 25                      |
| Northern Europe                                                                  | 1 (1.6)       | 67                      |
| Turkey                                                                           | 4 (6.6)       | 28-58                   |
| Israel                                                                           | 1 (1.6)       | 29                      |
| Iran                                                                             | 1 (1.6)       | 27                      |
| <b>Fasting status when metabolites measured</b>                                  |               |                         |
| Fasting                                                                          | 34 (55.7)     | 8-8774                  |
| Non-fasting                                                                      | 7 (11.5)      | 18-50                   |
| Fasting not typical (placenta, amniotic fluid, hair bio-specimens)               | 4 (6.5)       | 11-154                  |
| Unclear                                                                          | 15 (24.6)     | 14-249                  |
| Both fasting and non-fasting                                                     | 1 (1.6)       | 12                      |
| <b>Metabolite collection time*</b>                                               |               |                         |
| Prior to GDM diagnosis                                                           | 25 (41.0)     | 14-533                  |
| After or at same time as GDM diagnosis                                           | 39 (63.9)     | 8-8774                  |
| During delivery or postpartum (< 2 years postpartum)                             | 11 (18.0)     | 8-154                   |
| <b>GDM diagnostic method</b>                                                     |               |                         |
| IADPSG                                                                           | 18 (29.5)     | 9-533                   |
| WHO criteria (years 1998, 1999, 2013)                                            | 14 (23.0)     | 18-8774                 |
| Carpenter–Coustan criteria                                                       | 9 (14.8)      | 13-96                   |
| Associations (e.g., Canadian Diabetes Association, Polish Gynecological Society) | 11 (18.0)     | 11-107                  |
| Other (O’Sullivan and Mahan criteria, self-report, hospital records)             | 4 (6.6)       | 8-121                   |
| Not reported                                                                     | 5 (8.2)       | 12-27                   |

\*One study can measure same metabolites at different gestational ages.

**Supplemental Table S3.****Fasting serum metabolites measured in START (n = 63) and FAMILY (n = 62) using MSI-CE-MS**

| Metabolite                  | <i>m/z</i> :RMT:mode | HMDB ID or Molecular Formula/mass error | Identification Level |
|-----------------------------|----------------------|-----------------------------------------|----------------------|
| 2-Aminooctanoic acid        | 160.133:0.714:p      | HMDB0000991                             | 2                    |
| 2-Hydroxybutyric acid       | 103.040:1.295:n      | HMDB0000008                             | 1                    |
| 3-Hydroxybutyric acid       | 103.040:0.950:n      | HMDB0000357                             | 1                    |
| 3-Methyl-2-oxovaleric acid  | 129.056:1.268:n      | HMDB0000491                             | 1                    |
| 3-Methylhistidine           | 170.092:0.643:p      | HMDB0000479                             | 1                    |
| Acetylcarnitine             | 204.123:0.765:p      | HMDB0000201                             | 1                    |
| Alpha-ketoisovaleric acid   | 115.040:1.340:n      | HMDB0000019                             | 1                    |
| Alanine                     | 90.056:0.762:p       | HMDB0000161                             | 1                    |
| Amino adipic acid           | 162.076:0.918:p      | HMDB0000510                             | 1                    |
| Arginine                    | 175.119:0.609:p      | HMDB0000517                             | 1                    |
| Asparagine                  | 133.057:0.887:p      | HMDB0000168                             | 1                    |
| Aspartic acid               | 134.044:0.974:p      | HMDB0000191                             | 1                    |
| Asymmetric-dimethylarginine | 203.150:0.645:p      | HMDB0001539                             | 1                    |
| Carnitine                   | 162.112:0.723:p      | HMDB0000062                             | 1                    |
| Choline                     | 104.108:0.578:p      | HMDB0000097                             | 1                    |
| Citric acid                 | 191.020:2.519:n      | HMDB0000094                             | 1                    |
| Citrulline                  | 176.102:0.936:p      | HMDB0000904                             | 1                    |
| Creatine                    | 132.077:0.748:p      | HMDB0000064                             | 1                    |
| Creatinine                  | 114.066:0.621:p      | HMDB0000562                             | 1                    |
| Cysteinylglycine disulfide  | 298.053:0.808:p      | HMDB0000709                             | 2                    |
| Cystine                     | 241.030:0.934:p      | HMDB0000192                             | 1                    |
| Dimethylglycine             | 104.071:0.808:p      | HMDB0000092                             | 1                    |
| $\gamma$ -Butyrobetaine     | 146.118:0.690:p      | HMDB0001161                             | 1                    |
| Gluconic acid               | 195.052:1.160:n      | HMDB0000625                             | 1                    |
| Glucose                     | 179.056:0.999:n      | HMDB0000122                             | 1                    |
| Glutamic acid               | 148.060:0.925:p      | HMDB0000148                             | 1                    |
| Glutamine                   | 147.076:0.911:p      | HMDB0000641                             | 1                    |
| Glycine                     | 76.039:0.710:p       | HMDB0000123                             | 1                    |
| Guanidinoacetic acid        | 118.053:0.701:p      | HMDB0000128                             | 2                    |
| Hippuric acid               | 178.051:1.134:n      | HMDB0000714                             | 1                    |
| Histidine                   | 156.077:0.628:p      | HMDB0000177                             | 1                    |
| Hypoxanthine                | 137.046:1.077:p      | HMDB0000157                             | 1                    |
| Isoleucine                  | 132.102:0.846:p      | HMDB0000172                             | 1                    |
| Lactic acid                 | 89.025:1.412:n       | HMDB0000190                             | 1                    |
| Leucine                     | 132.102:0.856:p      | HMDB0000687                             | 1                    |
| Lysine                      | 147.113:0.588:p      | HMDB0000182                             | 1                    |
| Malic acid                  | 133.014:2.293:n      | HMDB0000744                             | 1                    |
| Methionine                  | 150.058:0.897:p      | HMDB0000696                             | 1                    |
| Monomethylarginine          | 189.134:0.613:p      | HMDB0029416                             | 1                    |
| Ornithine                   | 133.097:0.586:p      | HMDB0000214                             | 1                    |
| Oxo-proline                 | 128.035:1.262:n      | HMDB0000267                             | 1                    |
| Phenylacetylglutamine       | 263.104:1.087:n      | HMDB0006344                             | 1                    |
| Phenylalanine               | 166.086:0.925:p      | HMDB0000159                             | 1                    |

|                                                                 |                  |                                                                          |   |
|-----------------------------------------------------------------|------------------|--------------------------------------------------------------------------|---|
| Pipecolic acid                                                  | 130.086:0.588:p  | HMDB0000070                                                              | 2 |
| Proline                                                         | 116.070:0.907:p  | HMDB0000162                                                              | 1 |
| Proline betaine                                                 | 144.099:0.962:p  | HMDB0004827                                                              | 1 |
| Propionylcarnitine                                              | 218.114:0.790:p  | HMDB0000824                                                              | 1 |
| Pyruvic acid                                                    | 87.009:1.629:n   | HMDB0000243                                                              | 1 |
| Serine                                                          | 106.050:0.846:p  | HMDB0000187                                                              | 1 |
| Symmetric-dimethylarginine                                      | 203.1450:0.657:p | HMDB0003334                                                              | 1 |
| Taurine                                                         | 124.007:0.990:n  | HMDB0000251                                                              | 2 |
| Threonine                                                       | 120.065:0.887:p  | HMDB0000167                                                              | 1 |
| Trimethylamine N-oxide                                          | 76.077:0.555:p   | HMDB0000925                                                              | 1 |
| Tryptophan                                                      | 205.097:0.925:p  | HMDB0030396                                                              | 1 |
| Tryptophan betaine                                              | 247.144:1.153:p  | HMDB0061115                                                              | 1 |
| Tyrosine                                                        | 182.081:0.956:p  | HMDB0000158                                                              | 1 |
| Unknown singly charged ion*                                     | 129.066:0.739:p  | C <sub>5</sub> H <sub>8</sub> N <sub>2</sub> O <sub>2</sub> /7.7 ppm     | 3 |
| Unknown <sup>†</sup>                                            | 334.688:0.805:p  | C <sub>20</sub> H <sub>47</sub> N <sub>18</sub> O <sub>6</sub> S/3.6 ppm | 3 |
| Unknown <sup>‡</sup>                                            | 471.738:0.888:p  | C <sub>30</sub> H <sub>55</sub> N <sub>25</sub> O <sub>11</sub> /9.6 ppm | 4 |
| Unknown singly charged ion, identified as 2-hydroxyvaleric acid | 117.056:1.244:n  | C <sub>5</sub> H <sub>10</sub> O <sub>3</sub> /0 ppm                     | 3 |
| Uric acid                                                       | 167.021:1.198:n  | HMDB0000289                                                              | 1 |
| Valine                                                          | 118.086:0.835:p  | HMDB0000883                                                              | 1 |
| Xanthine                                                        | 151.026:1.192:n  | HMDB0000292                                                              | 2 |

\* Identified as a cation amino acid analog (see reference 68).

<sup>†</sup> Not measured in FAMILY. Unknown identified as a doubly charged peptide, containing histidine, proline, and leucine.

<sup>‡</sup> Unknown identified as a doubly charged peptide, containing alanine, glutamic acid, and histidine.

**Supplemental Table S4.****Metabolites that were significantly associated with GDM status (univariate  $p < 0.10$ )**

1. Glucose
2. Glutamic acid
3. Glutamine
4. 2-Aminooctanoic acid
5. Creatinine
6. Ornithine
7. Proline betaine
8. Arginine
9. Acetylcarnitine
10. Tryptophan
11. Oxo-proline
12. Propionylcarnitine
13. Cystine
14. Pyruvic acid
15. Citric acid
16. 2-Hydroxybutyric acid
17. 3-Hydroxybutyric acid
18. 3-methyl-2-oxovaleric acid
19. Unknown m/z: 129.066 ( $C_5H_8N_2O_2$ ), identified as a cation amino acid analog (see reference 68)
20. Unknown m/z: 417.738 (most likely molecular formula:  $C_{30}H_{55}N_{25}O_{11}$ ), identified as a doubly charged peptide, containing alanine, glutamic acid, and histidine
21. Glucose-to-creatinine ratio
22. Glucose-to-glutamine ratio
23. Glutamic acid-to-glutamine ratio
24. Alanine-to-glycine ratio
25. Leucine-to-glutamine ratio
26. Valine-to-glutamine ratio
27. Arginine-to-ornithine ratio
28. Citrulline-to-ornithine ratio

**Supplemental Table S5**

**Median (IQR) metabolite concentrations (micromoles,  $\mu\text{mol}$ ), metabolites with univariate  $p < 0.10$ , IADPSG diagnostic criteria, START and FAMILY**

| Metabolite*                      | Overall (n = 590) |                  | START (n = 299)  |                  | FAMILY (n = 291) |                  |
|----------------------------------|-------------------|------------------|------------------|------------------|------------------|------------------|
|                                  | GDM (n = 133)     | No GDM (n = 457) | GDM (n = 81)     | No GDM (n = 218) | GDM (n = 52)     | No GDM (n = 239) |
| Glucose                          | 5114.87 (738.09)  | 4745.30 (521.87) | 5222.57 (781.83) | 4819.01 (459.05) | 5072.33 (606.09) | 4667.12 (603.38) |
| Glutamic acid                    | 86.57 (36.71)     | 79.59 (32.85)    | 84.17 (35.06)    | 76.03 (33.18)    | 90.59 (37.62)    | 81.19 (34.76)    |
| Glutamine                        | 490.37 (153.31)   | 494.14 (129.33)  | 487.59 (166.65)  | 493.15 (138.37)  | 495.14 (154.82)  | 495.57 (125.26)  |
| Creatinine                       | 27.23 (10.19)     | 29.70 (10.34)    | 26.41 (8.55)     | 26.62 (9.79)     | 29.40 (10.41)    | 31.47 (8.48)     |
| Ornithine                        | 32.64 (16.18)     | 38.25 (15.01)    | 31.01 (11.02)    | 32.92 (15.84)    | 36.19 (17.27)    | 41.03 (13.09)    |
| Proline betaine                  | 1.38 (3.47)       | 1.96 (3.82)      | 1.27 (2.48)      | 1.61 (2.42)      | 1.69 (6.07)      | 2.45 (5.30)      |
| Arginine                         | 111.02 (50.38)    | 100.52 (46.41)   | 124.27 (64.75)   | 120.73 (68.9)    | 95.41 (36.06)    | 88.71 (27.52)    |
| Acetylcarnitine                  | 2.15 (0.75)       | 2.05 (0.80)      | 2.15 (0.78)      | 2.17 (0.87)      | 2.17 (0.59)      | 1.95 (0.70)      |
| Tryptophan                       | 27.32 (2.83)      | 26.59 (2.58)     | 26.59 (3.16)     | 26.10 (2.71)     | 28.09 (2.01)     | 26.85 (2.24)     |
| Oxo-proline                      | 22.51 (7.69)      | 24.57 (8.22)     | 21.54 (6.41)     | 22.26 (8.93)     | 24.52 (8.00)     | 25.41 (6.75)     |
| Propionylcarnitine               | 3.03 (0.70)       | 2.87 (0.56)      | 3.10 (0.73)      | 2.97 (0.75)      | 2.89 (0.52)      | 2.82 (0.39)      |
| Cystine                          | 14.18 (5.62)      | 16.57 (5.52)     | 13.01 (0.93)     | 13.11 (1.19)     | 18.71 (1.83)     | 18.5 (1.88)      |
| Pyruvic acid                     | 133.05 (60.64)    | 115.34 (64.42)   | 112.00 (57.38)   | 102.45 (65.13)   | 149.86 (63.30)   | 124.95 (61.20)   |
| Citric acid                      | 187.92 (73.75)    | 169.89 (66.65)   | 187.91 (90.14)   | 159.58 (86.56)   | 197.12 (63.66)   | 176.79 (57.34)   |
| 2-Hydroxybutyric acid            | 58.48 (25.67)     | 49.77 (23.27)    | 52.30 (24.30)    | 48.36 (22.86)    | 65.59 (29.60)    | 51.49 (26.68)    |
| 3-Hydroxybutyric acid            | 140.97 (45.34)    | 123.10 (43.95)   | 140.81 (41.79)   | 120.93 (34.15)   | 143.15 (50.20)   | 126.73 (49.03)   |
| 3-methyl-2-oxovaleric acid       | 38.53 (16.86)     | 35.19 (13.15)    | 38.14 (17.04)    | 36.77 (13.69)    | 40.29 (14.31)    | 33.54 (11.76)    |
| Glucose-to-creatinine ratio      | 183.63 (61.23)    | 159.70 (59.06)   | 192.57 (71.78)   | 181.55 (59.42)   | 170.03 (62.95)   | 145.69 (42.39)   |
| Glucose-to-glutamine ratio       | 10.61 (3.12)      | 9.46 (2.20)      | 10.95 (3.27)     | 9.7 (2.31)       | 10.41 (2.88)     | 9.35 (1.99)      |
| Arginine-to-ornithine ratio      | 3.43 (2.64)       | 2.75 (1.87)      | 4.10 (2.41)      | 3.93 (2.20)      | 2.45 (1.24)      | 2.15 (0.97)      |
| Citrulline-to-ornithine ratio    | 0.62 (0.30)       | 0.57 (0.23)      | 0.65 (0.27)      | 0.63 (0.31)      | 0.57 (0.29)      | 0.53 (0.17)      |
| Alanine-to-glycine ratio         | 1.82 (0.46)       | 1.75 (0.49)      | 1.80 (0.57)      | 1.79 (0.46)      | 1.86 (0.40)      | 1.67 (0.51)      |
| Glutamic acid-to-glutamine ratio | 0.19 (0.08)       | 0.16 (0.08)      | 0.18 (0.08)      | 0.15 (0.07)      | 0.19 (0.08)      | 0.16 (0.08)      |
| Valine-to-glutamine ratio        | 0.46 (0.13)       | 0.42 (0.12)      | 0.47 (0.13)      | 0.42 (0.11)      | 0.45 (0.18)      | 0.43 (0.11)      |
| Leucine-to-glutamine ratio       | 0.14 (0.05)       | 0.13 (0.03)      | 0.14 (0.04)      | 0.14 (0.03)      | 0.14 (0.04)      | 0.13 (0.03)      |

\* Concentrations not available for 2-aminooctanoic acid, or unknowns (129.066 and 417:738)

**Supplemental Table S6.**

**Results of k-fold cross validation for relationship between metabolites and GDM, adjusted for ethnicity, maternal age, maternal height, pre-pregnancy BMI, gestational age at recruitment family history of diabetes, smoking history, and diet quality (k = 10), START and FAMILY (n = 590)**

| Metabolite                                                                 | AUC (SD)    | Sensitivity (SD) | Specificity (SD) | Accuracy (SD) | Kappa (SD)  |
|----------------------------------------------------------------------------|-------------|------------------|------------------|---------------|-------------|
| Glucose                                                                    | 0.75 (0.06) | 0.94 (0.04)      | 0.22 (0.12)      | 0.79 (0.03)   | 0.22 (0.12) |
| Glutamic acid                                                              | 0.71 (0.07) | 0.96 (0.05)      | 0.16 (0.10)      | 0.79 (0.03)   | 0.18 (0.14) |
| Glutamine                                                                  | 0.70 (0.05) | 0.97 (0.02)      | 0.17 (0.10)      | 0.78 (0.04)   | 0.16 (0.14) |
| 2-Aminooctanoic acid                                                       | 0.70 (0.11) | 0.97 (0.03)      | 0.16 (0.13)      | 0.79 (0.03)   | 0.17 (0.13) |
| Creatinine                                                                 | 0.71 (0.06) | 0.97 (0.02)      | 0.17 (0.11)      | 0.79 (0.03)   | 0.17 (0.14) |
| Ornithine                                                                  | 0.70 (0.07) | 0.96 (0.02)      | 0.17 (0.08)      | 0.78 (0.04)   | 0.17 (0.13) |
| Proline betaine                                                            | 0.70 (0.08) | 0.97 (0.03)      | 0.16 (0.13)      | 0.79 (0.02)   | 0.17 (0.11) |
| Arginine                                                                   | 0.71 (0.09) | 0.97 (0.03)      | 0.13 (0.07)      | 0.78 (0.03)   | 0.14 (0.14) |
| Acetylcarnitine                                                            | 0.70 (0.12) | 0.97 (0.03)      | 0.16 (0.11)      | 0.78 (0.03)   | 0.16 (0.11) |
| Tryptophan                                                                 | 0.70 (0.08) | 0.96 (0.02)      | 0.17 (0.11)      | 0.78 (0.04)   | 0.18 (0.17) |
| Oxo-proline                                                                | 0.71 (0.09) | 0.96 (0.04)      | 0.17 (0.09)      | 0.78 (0.04)   | 0.17 (0.15) |
| Propionylcarnitine                                                         | 0.71 (0.08) | 0.96 (0.03)      | 0.17 (0.12)      | 0.79 (0.03)   | 0.19 (0.11) |
| Cystine                                                                    | 0.71 (0.09) | 0.97 (0.03)      | 0.17 (0.06)      | 0.78 (0.03)   | 0.17 (0.10) |
| Pyruvic acid                                                               | 0.71 (0.11) | 0.96 (0.04)      | 0.19 (0.12)      | 0.78 (0.03)   | 0.15 (0.13) |
| Citric acid                                                                | 0.70 (0.07) | 0.97 (0.03)      | 0.16 (0.06)      | 0.79 (0.03)   | 0.18 (0.15) |
| 2-Hydroxybutyric acid                                                      | 0.72 (0.09) | 0.97 (0.03)      | 0.17 (0.10)      | 0.78 (0.03)   | 0.15 (0.12) |
| 3-Hydroxybutyric acid                                                      | 0.71 (0.09) | 0.97 (0.04)      | 0.18 (0.07)      | 0.78 (0.03)   | 0.16 (0.16) |
| 3-methyl-2-oxovaleric acid                                                 | 0.72 (0.09) | 0.97 (0.03)      | 0.14 (0.07)      | 0.78 (0.02)   | 0.14 (0.12) |
| C <sub>5</sub> H <sub>8</sub> N <sub>2</sub> O <sub>2</sub> (129.066)*     | 0.71 (0.09) | 0.97 (0.03)      | 0.18 (0.05)      | 0.79 (0.03)   | 0.19 (0.10) |
| C <sub>30</sub> H <sub>55</sub> N <sub>25</sub> O <sub>11</sub> (417.738)† | 0.70 (0.06) | 0.97 (0.02)      | 0.16 (0.07)      | 0.79 (0.03)   | 0.17 (0.15) |
| Glucose-to-glutamine ratio                                                 | 0.76 (0.07) | 0.95 (0.04)      | 0.25 (0.10)      | 0.79 (0.03)   | 0.23 (0.14) |
| Glutamic acid-to-glutamine ratio                                           | 0.72 (0.08) | 0.96 (0.04)      | 0.20 (0.11)      | 0.79 (0.04)   | 0.18 (0.22) |
| Alanine-to-glycine ratio                                                   | 0.69 (0.12) | 0.97 (0.02)      | 0.17 (0.08)      | 0.79 (0.03)   | 0.17 (0.16) |
| Leucine-to-glutamine ratio                                                 | 0.70 (0.07) | 0.97 (0.03)      | 0.18 (0.16)      | 0.78 (0.04)   | 0.17 (0.13) |
| Valine-to-glutamine ratio                                                  | 0.71 (0.10) | 0.97 (0.03)      | 0.16 (0.11)      | 0.78 (0.03)   | 0.16 (0.16) |
| Glucose-to-creatinine ratio                                                | 0.73 (0.09) | 0.95 (0.04)      | 0.19 (0.05)      | 0.78 (0.03)   | 0.18 (0.10) |
| Arginine-to-ornithine ratio                                                | 0.71 (0.07) | 0.96 (0.03)      | 0.14 (0.09)      | 0.78 (0.03)   | 0.15 (0.10) |
| Citrulline-to-ornithine ratio                                              | 0.71 (0.10) | 0.97 (0.03)      | 0.15 (0.12)      | 0.78 (0.03)   | 0.17 (0.07) |

\* Unknown identified as a cation amino acid analog (see reference 68), reported as most likely molecular formula (*m/z*)

† Unknown identified as a doubly charged peptide, containing alanine, glutamic acid, and histidine, reported as most likely molecular formula (*m/z*)

**Supplemental Table S7.****Ethnic-specific associations between metabolites and odds of GDM (95% CI), per 1-SD log-transformed metabolite RPA, IADPSG diagnostic criteria**

| Metabolite                                                                             | Overall, START and FAMILY, adjusted* (n = 590) | START, South Asian women, adjusted† (n = 299) | FAMILY, white European women, adjusted† (n = 291) | p-value for ethnicity interaction unadjusted | p-value for ethnicity interaction adjusted† |
|----------------------------------------------------------------------------------------|------------------------------------------------|-----------------------------------------------|---------------------------------------------------|----------------------------------------------|---------------------------------------------|
| Glucose                                                                                | 2.07 (1.58-2.71)                               | 2.22 (1.54-3.20)                              | 1.95 (1.30-2.92)                                  | 0.64                                         | 0.71                                        |
| Glutamic acid                                                                          | 1.35 (1.08-1.69)                               | 1.48 (1.11-1.98)                              | 1.18 (0.82-1.69)                                  | 0.50                                         | 0.46                                        |
| Glutamine                                                                              | 0.86 (0.70-1.06)                               | 0.79 (0.61-1.02)                              | 1.02 (0.70-1.50)                                  | 0.46                                         | 0.29                                        |
| 2-Aminooctanoic acid                                                                   | 1.09 (0.87-1.37)                               | 1.13 (0.86-1.49)                              | 0.98 (0.64-1.50)                                  | 0.55                                         | 0.62                                        |
| Creatinine                                                                             | 0.92 (0.74-1.14)                               | 1.02 (0.79-1.33)                              | 0.70 (0.46-1.07)                                  | 0.12                                         | 0.12                                        |
| Ornithine                                                                              | 0.83 (0.67-1.03)                               | 0.89 (0.69-1.15)                              | 0.66 (0.42-1.01)                                  | 0.08                                         | 0.25                                        |
| Proline betaine                                                                        | 0.97 (0.78-1.21)                               | 0.99 (0.74-1.32)                              | 0.94 (0.66-1.34)                                  | 0.42                                         | 0.78                                        |
| Arginine                                                                               | 1.10 (0.87-1.40)                               | 1.01 (0.77-1.34)                              | 1.43 (0.87-2.35)                                  | 0.17                                         | 0.23                                        |
| Acetylcarnitine                                                                        | 1.05 (0.83-1.31)                               | 0.95 (0.72-1.25)                              | 1.28 (0.83-1.96)                                  | 0.07                                         | 0.24                                        |
| Tryptophan                                                                             | 1.17 (0.95-1.45)                               | 1.14 (0.88-1.48)                              | 1.21 (0.81-1.79)                                  | 0.07                                         | 0.67                                        |
| Oxo-proline                                                                            | 0.86 (0.69-1.06)                               | 0.90 (0.71-1.15)                              | 0.69 (0.44-1.09)                                  | 0.66                                         | 0.37                                        |
| Propionylcarnitine                                                                     | 1.35 (1.08-1.69)                               | 1.25 (0.99-1.58)                              | 1.63 (1.11-2.41)                                  | 0.06                                         | 0.11                                        |
| Cystine                                                                                | 0.77 (0.57-1.04)                               | 0.75 (0.56-1.02)                              | 1.20 (0.85-1.69)                                  | <b>0.02</b>                                  | 0.17                                        |
| Pyruvic acid                                                                           | 1.31 (1.04-1.63)                               | 1.23 (0.95-1.59)                              | 1.61 (1.01-2.57)                                  | <b>0.04</b>                                  | 0.30                                        |
| Citric acid                                                                            | 1.03 (0.85-1.26)                               | 1.04 (0.85-1.27)                              | 1.00 (0.44-2.25)                                  | 0.63                                         | 0.97                                        |
| 2-Hydroxybutyric acid                                                                  | 1.44 (1.15-1.81)                               | 1.39 (1.04-1.86)                              | 1.51 (1.03-2.20)                                  | 0.43                                         | 0.76                                        |
| 3-Hydroxybutyric acid                                                                  | 1.31 (1.04-1.67)                               | 1.29 (0.94-1.76)                              | 1.33 (0.92-1.93)                                  | 0.93                                         | 0.73                                        |
| 3-methyl-2-oxovaleric acid                                                             | 1.28 (1.03-1.57)                               | 1.14 (0.88-1.48)                              | 1.54 (1.07-2.21)                                  | <b>0.02</b>                                  | 0.16                                        |
| C <sub>5</sub> H <sub>8</sub> N <sub>2</sub> O <sub>2</sub> (129.066) <sup>‡</sup>     | 0.76 (0.60-0.95)                               | 0.68 (0.51-0.91)                              | 0.88 (0.61-1.26)                                  | <b>0.04</b>                                  | 0.32                                        |
| C <sub>30</sub> H <sub>55</sub> N <sub>25</sub> O <sub>11</sub> (417.738) <sup>§</sup> | 0.98 (0.74-1.30)                               | 0.86 (0.60-1.24)                              | 1.18 (0.76-1.82)                                  | 0.10                                         | 0.27                                        |
| Glucose-to-glutamine ratio                                                             | 2.15 (1.65-2.80)                               | 2.41 (1.70-3.41)                              | 1.88 (1.22-2.89)                                  | 0.79                                         | 0.52                                        |
| Glutamic acid-to-glutamine ratio                                                       | 1.46 (1.16-1.83)                               | 1.73 (1.28-2.33)                              | 1.15 (0.80-1.65)                                  | 0.18                                         | 0.18                                        |
| Alanine-to-glycine ratio                                                               | 1.14 (0.92-1.42)                               | 0.91 (0.69-1.21)                              | 1.66 (1.13-2.43)                                  | <b>0.01</b>                                  | <b>0.02</b>                                 |
| Leucine-to-glutamine ratio                                                             | 1.03 (0.84-1.26)                               | 0.99 (0.81-1.22)                              | 1.59 (0.74-3.42)                                  | 0.20                                         | 0.26                                        |
| Valine-to-glutamine ratio                                                              | 1.16 (0.94-1.44)                               | 1.24 (0.95-1.63)                              | 1.04 (0.72-1.50)                                  | 0.41                                         | 0.47                                        |
| Glucose-to-creatinine ratio                                                            | 1.79 (1.39-2.32)                               | 1.53 (1.13-2.09)                              | 2.51 (1.56-4.02)                                  | 0.07                                         | 0.08                                        |
| Arginine-to-ornithine ratio                                                            | 1.34 (1.03-1.75)                               | 1.14 (0.84-1.56)                              | 2.17 (1.25-3.74)                                  | <b>0.02</b>                                  | 0.06                                        |
| Citrulline-to-ornithine ratio                                                          | 1.22 (0.99-1.51)                               | 1.11 (0.87-1.42)                              | 1.60 (1.03-2.48)                                  | <b>0.03</b>                                  | 0.19                                        |

\* Adjusted for adjusted for ethnicity, maternal age, maternal height, pre-pregnancy BMI, gestational age at recruitment, family history of diabetes, smoking history, and diet quality

† Adjusted for maternal age, maternal height, pre-pregnancy BMI, gestational age at recruitment, family history of diabetes, smoking history, and diet quality

‡ Unknown identified as a cation amino acid analog (see reference 68), reported as most likely molecular formula (m/z)

§ Unknown identified as a doubly charged peptide, containing alanine, glutamic acid, and histidine, reported as most likely molecular formula (m/z)



**Supplemental Table S8.****Metabolic pathways significantly impacted by GDM, with  $p < 0.05$  and impact  $> 0.10$ , sorted by impact, KEGG database, by cohort**

| Pathway name                                                                                                  | Cohort | Significant metabolites | Measured metabolites | Total metabolites | Metabolites Involved                                                                                 | P-value | FDR    | Impact |
|---------------------------------------------------------------------------------------------------------------|--------|-------------------------|----------------------|-------------------|------------------------------------------------------------------------------------------------------|---------|--------|--------|
| <b>a. Pathways significant in both START and FAMILY studies (tested independently in each cohort) (n = 6)</b> |        |                         |                      |                   |                                                                                                      |         |        |        |
| Alanine, aspartic acid, and glutamic acid metabolism*                                                         | START  | 4                       | 7                    | 28                | Glutamic acid, glutamine, citric acid, alanine, pyruvic acid, aspartic acid, asparagine              | 0.022   | 0.077  | 0.56   |
|                                                                                                               | FAMILY |                         |                      |                   |                                                                                                      | 0.029   | 0.068  | 0.56   |
| Glyoxylic acid and dicarboxylic acid metabolism*                                                              | START  | 4                       | 6                    | 32                | Glutamic acid, glutamine, glycine, citric acid, serine, pyruvic acid                                 | 0.021   | 0.077  | 0.23   |
|                                                                                                               | FAMILY |                         |                      |                   |                                                                                                      | 0.011   | 0.039  | 0.23   |
| Production of ketone bodies*                                                                                  | START  | 1                       | 1                    | 5                 | 3-hydroxybutyric acid                                                                                | 0.022   | 0.077  | 0.14   |
|                                                                                                               | FAMILY |                         |                      |                   |                                                                                                      | 0.013   | 0.040  | 0.14   |
| Butyric acid metabolism*                                                                                      | START  | 2                       | 2                    | 15                | Glutamic acid, 3-hydroxybutyric acid                                                                 | 0.001   | 0.009  | 0.13   |
|                                                                                                               | FAMILY |                         |                      |                   |                                                                                                      | 0.014   | 0.041  | 0.13   |
| Glutathione metabolism*                                                                                       | START  | 1                       | 4                    | 28                | Glutamic acid, ornithine, 5-oxoproline, glycine                                                      | 0.038   | 0.113  | 0.12   |
|                                                                                                               | FAMILY |                         |                      |                   |                                                                                                      | 0.019   | 0.047  | 0.12   |
| Glycolysis/Gluconeogenesis*                                                                                   | START  | 3                       | 3                    | 26                | Glucose, pyruvic acid, lactic acid                                                                   | <0.001  | <0.001 | 0.10   |
|                                                                                                               | FAMILY |                         |                      |                   |                                                                                                      | <0.001  | <0.001 | 0.10   |
| <b>b. Pathways significant in South Asian women (START Study) only (n = 4)</b>                                |        |                         |                      |                   |                                                                                                      |         |        |        |
| Arginine biosynthesis*                                                                                        |        | 2                       | 6                    | 14                | Glutamic acid, glutamine, aspartic acid, arginine, ornithine, citrulline                             | 0.022   | 0.077  | 0.56   |
| Glutamine and glutamic acid metabolism*                                                                       |        | 2                       | 2                    | 6                 | Glutamic acid, glutamine                                                                             | 0.001   | 0.009  | 0.50   |
| Histidine metabolism*                                                                                         |        | 1                       | 4                    | 16                | Glutamic acid, histidine, aspartic acid, 3-methylhistidine                                           | 0.032   | 0.103  | 0.33   |
| Nitrogen metabolism*                                                                                          |        | 2                       | 2                    | 6                 | Glutamic acid, glutamine                                                                             | 0.001   | 0.009  | 0.25   |
| <b>c. Pathways significant in white European women (FAMILY Study) only (n = 8)</b>                            |        |                         |                      |                   |                                                                                                      |         |        |        |
| Valine, leucine, and isoleucine biosynthesis*                                                                 |        | 1                       | 6                    | 8                 | Threonine, isoleucine, 3-methyl-2-oxovaleric acid, leucine, valine, $\alpha$ -ketoisovaleric acid    | 0.010   | 0.037  | 1.00   |
| Glycine, serine, and threonine metabolism                                                                     |        | 2                       | 8                    | 33                | Choline, pyruvic acid, dimethylglycine, glycine, threonine, serine, creatinine, guanidinoacetic acid | 0.015   | 0.041  | 0.56   |
| Arginine and proline metabolism*                                                                              |        | 3                       | 7                    | 38                | Arginine, guanidinoacetic acid, creatine, proline, glutamic acid, ornithine, pyruvic acid            | 0.001   | 0.012  | 0.37   |
| Pyruvic acid metabolism*                                                                                      |        | 1                       | 2                    | 22                | Pyruvic acid, lactic acid                                                                            | 0.005   | 0.024  | 0.21   |
| Tryptophan metabolism*                                                                                        |        | 1                       | 1                    | 41                | Tryptophan                                                                                           | 0.001   | 0.012  | 0.14   |
| Tyrosine metabolism*                                                                                          |        | 1                       | 2                    | 42                | Pyruvic acid, tyrosine                                                                               | 0.003   | 0.014  | 0.14   |
| Citric acid cycle (TCA cycle)*                                                                                |        | 2                       | 2                    | 20                | Pyruvic acid, citric acid                                                                            | 0.002   | 0.014  | 0.14   |
| Cysteine and methionine metabolism*                                                                           |        | 1                       | 4                    | 33                | Serine, methionine, cysteine, pyruvic acid                                                           | 0.003   | 0.014  | 0.13   |

\* When both cohorts are analyzed together, this pathway is significant,  $p < 0.10$  and impact  $> 0.10$

**Supplemental Table S9.**

Associations between metabolites and odds of GDM (95% CI), per 1-SD log-transformed metabolite RPA, sensitivity analyses: a) unadjusted vs adjusted b) IADPSG vs. Born in Bradford criteria c) complete case vs. multiple imputation, among metabolites univariate  $p < 0.10$  (n = 600)

| Metabolite                                                                             | IADPSG                    |                          |                          |                                         | BiB in START, IADPSG in FAMILY |                          |
|----------------------------------------------------------------------------------------|---------------------------|--------------------------|--------------------------|-----------------------------------------|--------------------------------|--------------------------|
|                                                                                        | Unadjusted, complete case | Adjusted*, complete case | Adjusted†, complete case | Adjusted*, multiple imputation (m = 10) | Unadjusted, complete case      | Adjusted*, complete case |
| Glucose                                                                                | 2.25 (1.78-2.84)          | 2.07 (1.58-2.70)         | 2.07 (1.58-2.71)         | 1.99 (1.56-2.55)                        | 1.99 (1.61-2.47)               | 1.73 (1.35-2.22)         |
| Glutamic acid                                                                          | 1.37 (1.12-1.67)          | 1.34 (1.07-1.67)         | 1.35 (1.08-1.69)         | 1.27 (1.02-1.58)                        | 1.29 (1.08-1.55)               | 1.31 (1.06-1.61)         |
| Glutamine                                                                              | 0.78 (0.64-0.95)          | 0.86 (0.70-1.06)         | 0.86 (0.70-1.06)         | 0.85 (0.69-1.04)                        | 0.77 (0.64-0.92)               | 0.84 (0.69-1.02)         |
| 2-Aminooctanoic acid                                                                   | 1.29 (1.06-1.57)          | 1.09 (0.87-1.37)         | 1.09 (0.87-1.37)         | 1.13 (0.90-1.40)                        | 1.37 (1.14-1.65)               | 1.07 (0.86-1.32)         |
| Creatinine                                                                             | 0.82 (0.68-1.00)          | 0.91 (0.74-1.14)         | 0.92 (0.74-1.14)         | 0.91 (0.74-1.13)                        | 0.80 (0.67-0.96)               | 0.98 (0.80-1.20)         |
| Ornithine                                                                              | 0.75 (0.63-0.91)          | 0.83 (0.67-1.03)         | 0.83 (0.67-1.03)         | 0.78 (0.63-0.97)                        | 0.68 (0.57-0.81)               | 0.81 (0.66-0.99)         |
| Proline betaine                                                                        | 0.85 (0.70-1.03)          | 0.97 (0.78-1.21)         | 0.97 (0.78-1.21)         | 0.95 (0.77-1.18)                        | 0.84 (0.71-1.01)               | 1.02 (0.82-1.25)         |
| Arginine                                                                               | 1.25 (1.03-1.51)          | 1.10 (0.87-1.40)         | 1.10 (0.87-1.40)         | 1.07 (0.85-1.36)                        | 1.48 (1.24-1.77)               | 1.15 (0.92-1.43)         |
| Acetylcarnitine                                                                        | 1.23 (1.01-1.49)          | 1.05 (0.83-1.31)         | 1.04 (0.83-1.31)         | 1.07 (0.86-1.32)                        | 1.26 (1.05-1.51)               | 1.05 (0.85-1.30)         |
| Tryptophan                                                                             | 1.24 (1.02-1.49)          | 1.17 (0.94-1.44)         | 1.17 (0.94-1.45)         | 1.20 (0.98-1.47)                        | 1.25 (1.04-1.49)               | 1.30 (1.06-1.59)         |
| Oxo-proline                                                                            | 0.81 (0.67-0.99)          | 0.86 (0.69-1.06)         | 0.86 (0.69-1.06)         | 0.85 (0.69-1.05)                        | 0.77 (0.64-0.92)               | 0.85 (0.69-1.03)         |
| Propionylcarnitine                                                                     | 1.38 (1.11-1.71)          | 1.35 (1.08-1.69)         | 1.35 (1.08-1.69)         | 1.36 (1.09-1.70)                        | 1.33 (1.09-1.61)               | 1.30 (1.07-1.59)         |
| Cystine                                                                                | 0.78 (0.65-0.93)          | 0.77 (0.57-1.03)         | 0.77 (0.57-1.04)         | 0.80 (0.60-1.08)                        | 0.69 (0.58-0.82)               | 0.95 (0.72-1.25)         |
| Pyruvic acid                                                                           | 1.32 (1.08-1.61)          | 1.31 (1.05-1.63)         | 1.31 (1.05-1.64)         | 1.30 (1.04-1.61)                        | 1.18 (0.98-1.42)               | 1.25 (1.02-1.54)         |
| Citric acid                                                                            | 1.02 (0.84-1.24)          | 1.03 (0.84-1.25)         | 1.03 (0.85-1.26)         | 1.04 (0.85-1.26)                        | 1.09 (0.91-1.31)               | 1.16 (0.96-1.40)         |
| 2-Hydroxybutyric acid                                                                  | 1.40 (1.14-1.70)          | 1.44 (1.15-1.81)         | 1.44 (1.15-1.81)         | 1.41 (1.13-1.77)                        | 1.19 (0.99-1.42)               | 1.26 (1.02-1.56)         |
| 3-Hydroxybutyric acid                                                                  | 1.35 (1.11-1.63)          | 1.28 (1.02-1.60)         | 1.32 (1.04-1.67)         | 1.21 (0.97-1.51)                        | 1.33 (1.11-1.59)               | 1.34 (1.07-1.66)         |
| 3-methyl-2-oxovaleric acid                                                             | 1.42 (1.17-1.72)          | 1.27 (1.03-1.57)         | 1.28 (1.03-1.57)         | 1.26 (1.03-1.55)                        | 1.51 (1.26-1.81)               | 1.33 (1.09-1.62)         |
| C <sub>5</sub> H <sub>8</sub> N <sub>2</sub> O <sub>2</sub> (129.066) <sup>‡</sup>     | 0.71 (0.58-0.87)          | 0.75 (0.60-0.94)         | 0.75 (0.60-0.94)         | 0.77 (0.62-0.95)                        | 0.75 (0.63-0.90)               | 0.81 (0.66-1.00)         |
| C <sub>30</sub> H <sub>55</sub> N <sub>25</sub> O <sub>11</sub> (417.738) <sup>§</sup> | 1.19 (0.98-1.45)          | 0.99 (0.75-1.30)         | 0.98 (0.74-1.30)         | 1.01 (0.77-1.32)                        | 1.48 (1.23-1.79)               | 1.07 (0.82-1.38)         |
| Glucose-to-glutamine ratio                                                             | 2.44 (1.94-3.09)          | 2.14 (1.65-2.78)         | 2.15 (1.65-2.80)         | 2.13 (1.65-2.75)                        | 2.27 (1.83-2.81)               | 1.90 (1.48-2.43)         |
| Glutamic acid-to-glutamine ratio                                                       | 1.53 (1.25-1.87)          | 1.45 (1.16-1.82)         | 1.46 (1.16-1.83)         | 1.39 (1.12-1.74)                        | 1.47 (1.22-1.76)               | 1.44 (1.16-1.79)         |
| Alanine-to-glycine ratio                                                               | 1.23 (1.01-1.50)          | 1.15 (0.92-1.43)         | 1.14 (0.92-1.42)         | 1.14 (0.92-1.41)                        | 1.34 (1.12-1.61)               | 1.26 (1.02-1.55)         |
| Leucine-to-glutamine ratio                                                             | 1.04 (0.85-1.27)          | 1.03 (0.84-1.26)         | 1.03 (0.84-1.26)         | 1.03 (0.85-1.26)                        | 1.06 (0.88-1.28)               | 1.08 (0.89-1.30)         |
| Valine-to-glutamine ratio                                                              | 1.22 (1.01-1.48)          | 1.17 (0.94-1.44)         | 1.16 (0.94-1.44)         | 1.16 (0.94-1.43)                        | 1.23 (1.03-1.47)               | 1.17 (0.96-1.43)         |
| Glucose-to-creatinine ratio                                                            | 2.03 (1.63-2.53)          | 1.79 (1.39-2.32)         | 1.79 (1.39-2.32)         | 1.77 (1.38-2.27)                        | 1.94 (1.58-2.38)               | 1.47 (1.16-1.86)         |
| Arginine-to-ornithine ratio                                                            | 1.46 (1.20-1.77)          | 1.34 (1.03-1.75)         | 1.34 (1.03-1.76)         | 1.39 (1.07-1.80)                        | 1.80 (1.49-2.17)               | 1.43 (1.11-1.84)         |
| Citrulline-to-ornithine ratio                                                          | 1.28 (1.06-1.54)          | 1.21 (0.98-1.50)         | 1.22 (0.99-1.51)         | 1.30 (1.06-1.59)                        | 1.36 (1.14-1.62)               | 1.22 (1.00-1.50)         |

\* Adjustments: ethnicity, maternal age, maternal height, pre-pregnancy BMI, gestational age at recruitment, family history of diabetes, smoking history, and diet quality.

† Adjustments: ethnicity, maternal age, maternal height, pre-pregnancy BMI, gestational age at recruitment, family history of diabetes, smoking history, diet quality, and plant protein intake.

‡ Unknown identified as a cation amino acid analog (see reference 68), reported as most likely molecular formula (m/z).

§ Unknown identified as a doubly charged peptide, containing alanine, glutamic acid, and histidine, reported as most likely molecular formula (m/z).

**Supplemental Figure S1.**

**Standardized mean difference (95% CI) in serum metabolites, comparing women with GDM (n = 133) to women without GDM (n = 457), p < 0.05**

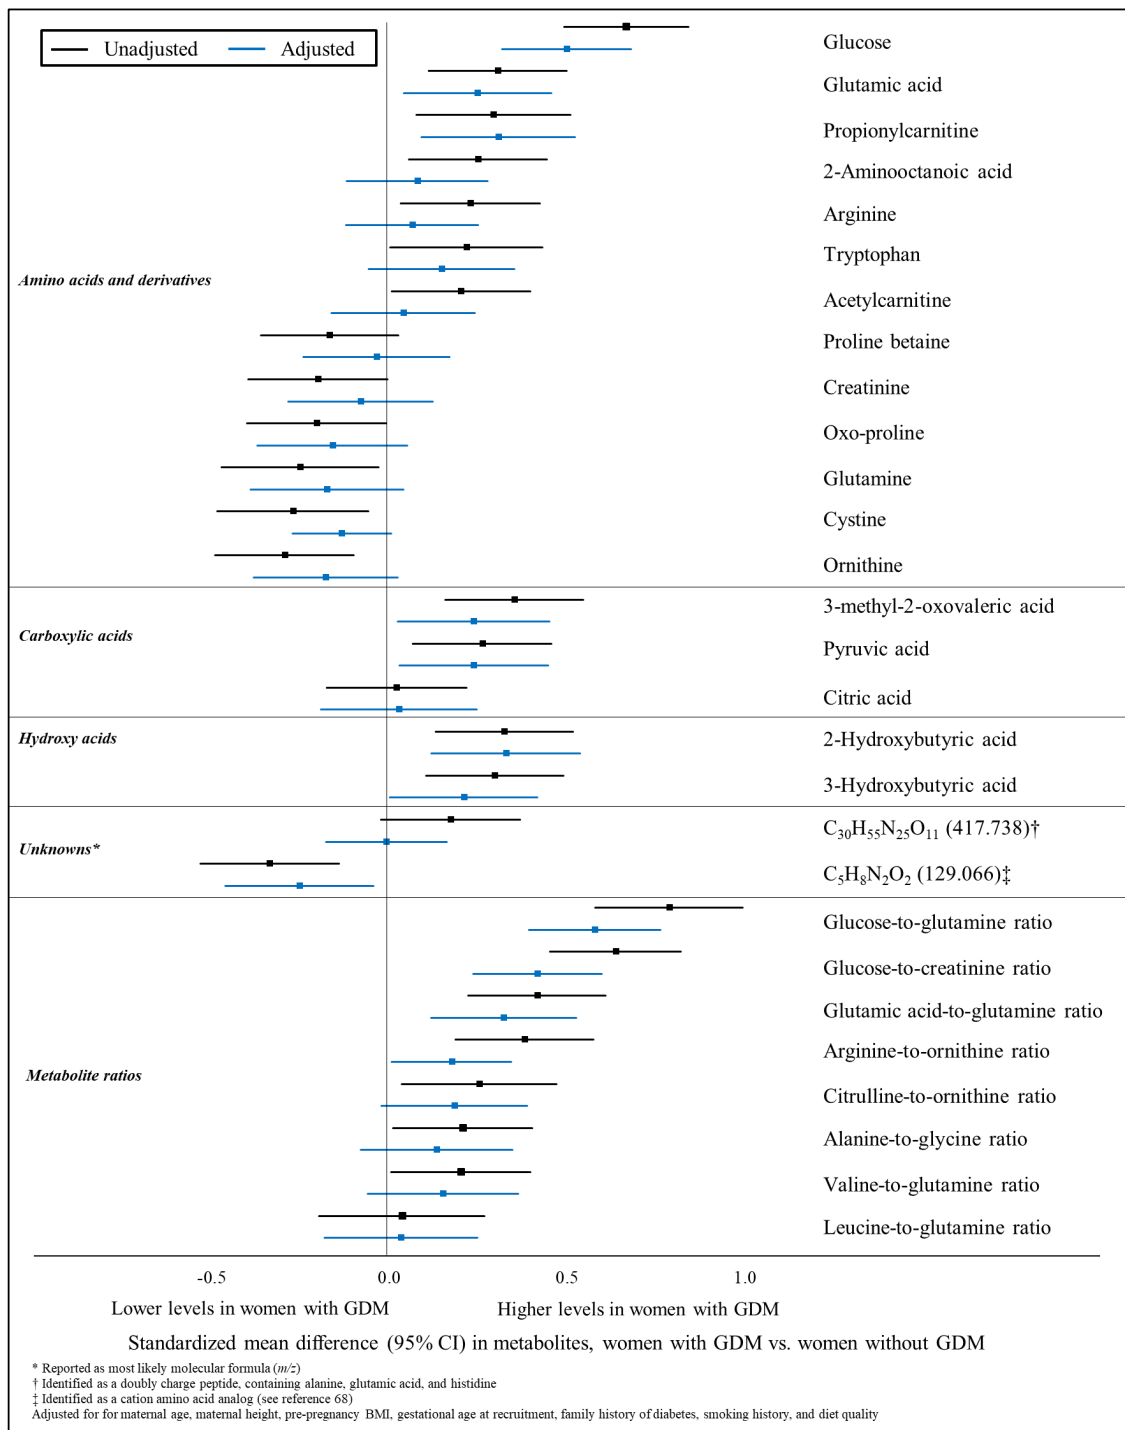



**Supplemental Figure S3.****Schematic of the metabolic pathways, and their inter-relationships, associated with GDM in START and FAMILY**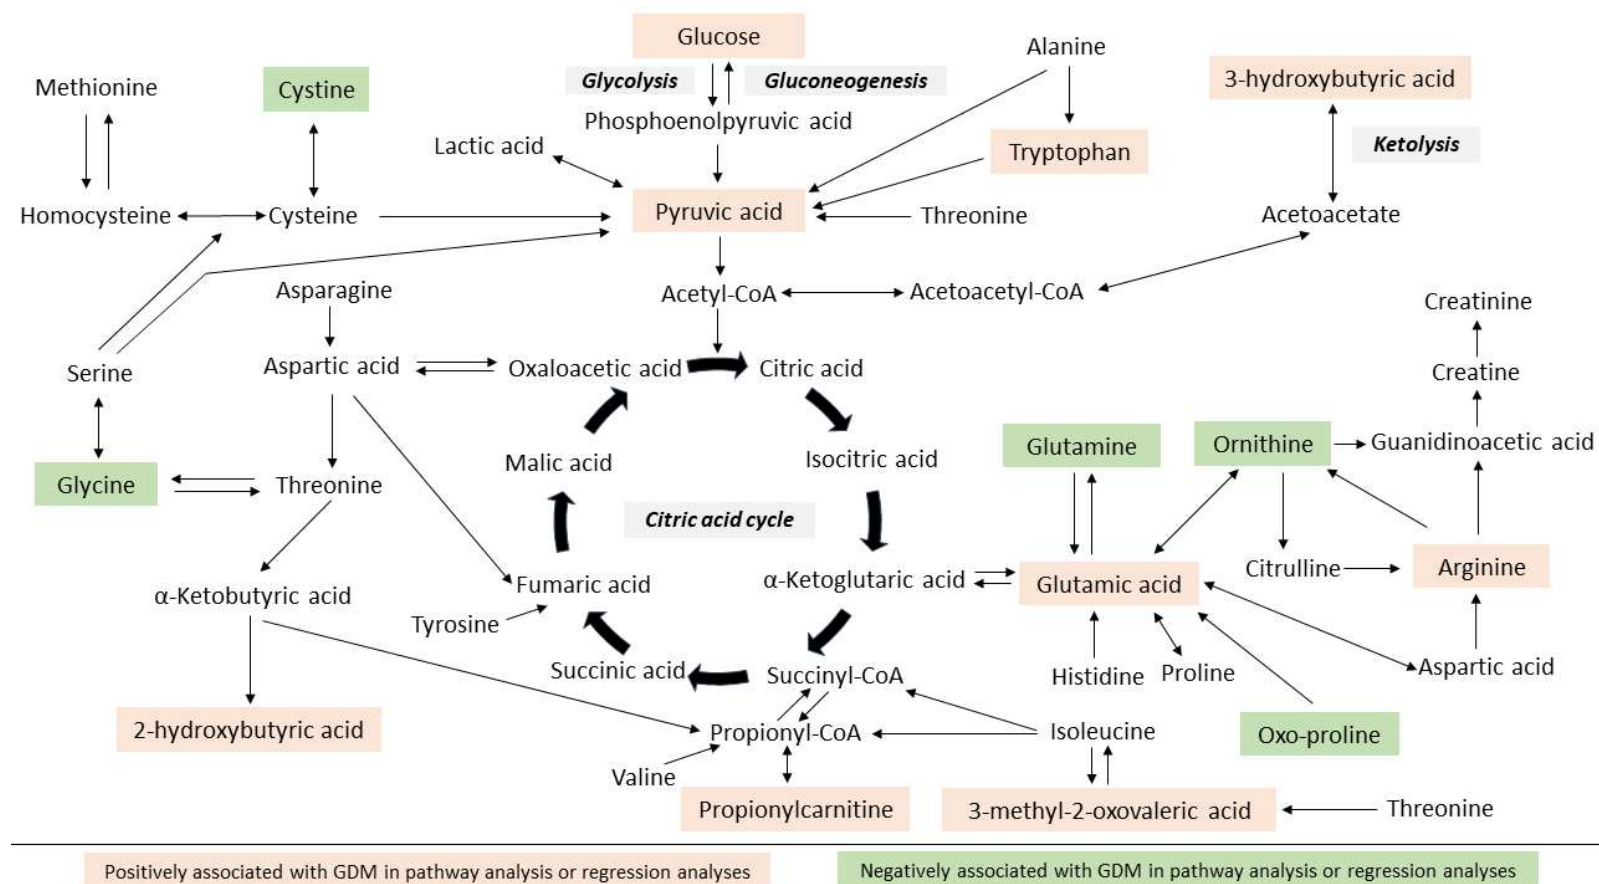

**Supplemental Figure S4.**

**Standardized mean difference (95% CI) in serum metabolites among all women (n = 590), comparing South Asian (n = 299) to white European (n = 291) women, p < 0.05**

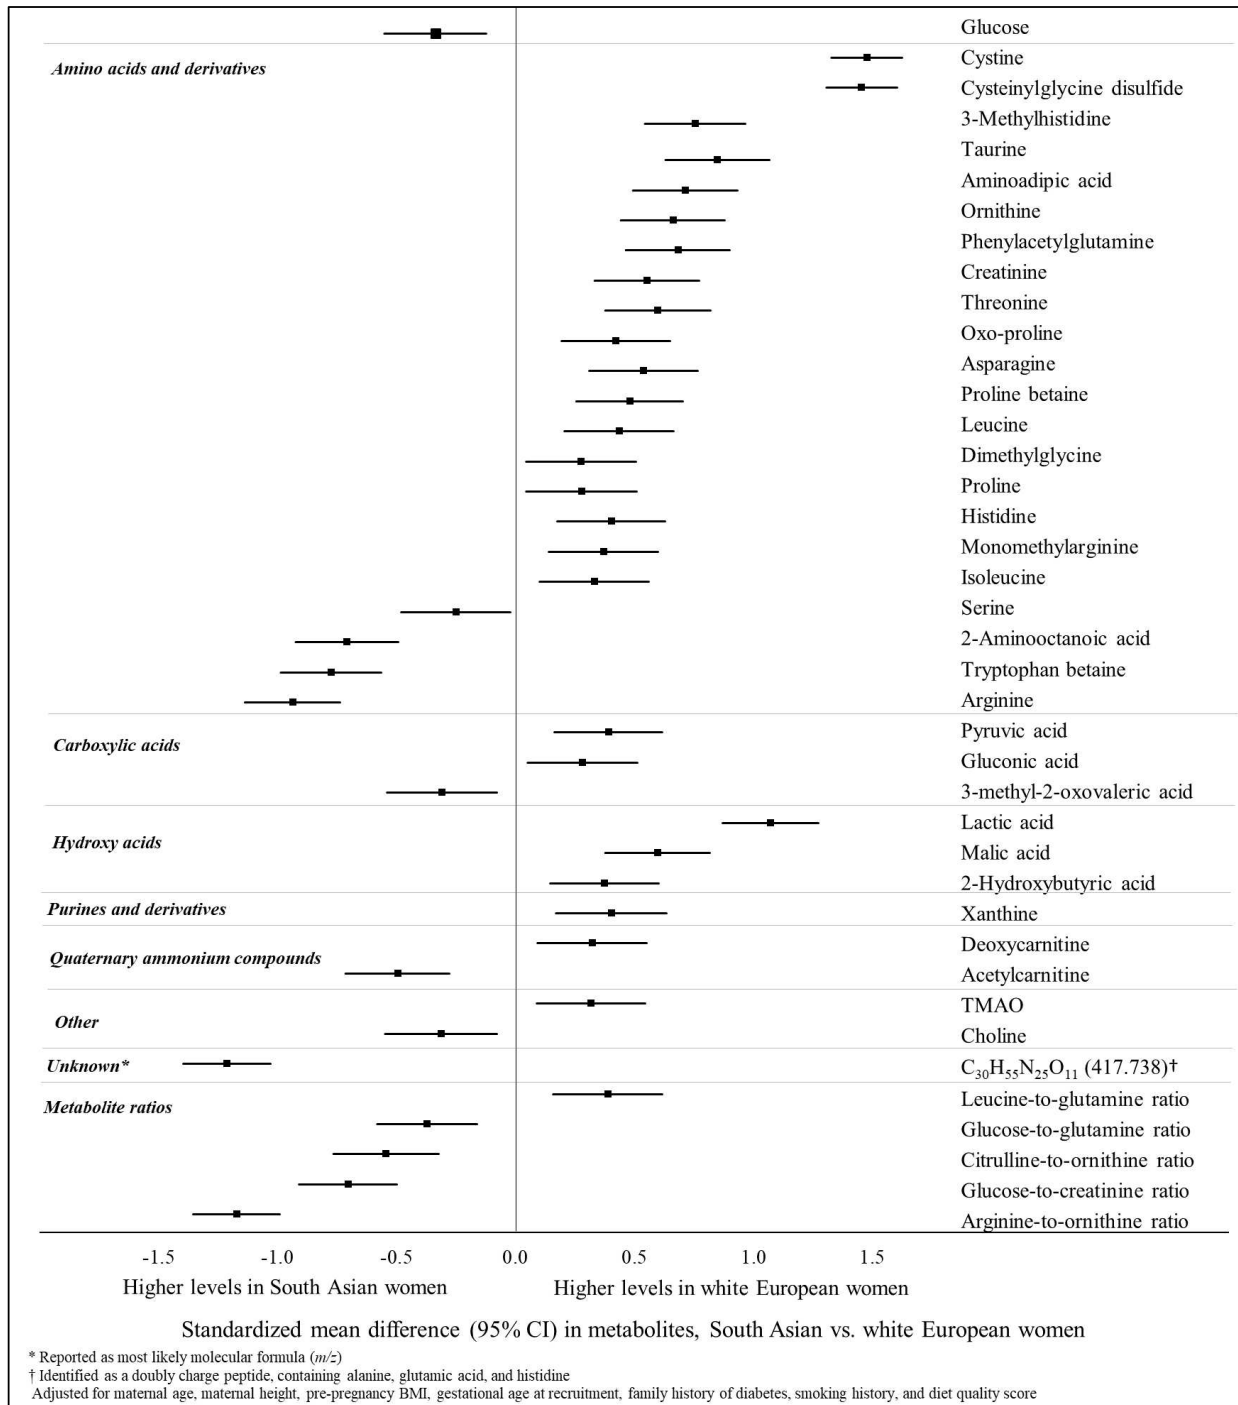



## Supplemental Figure S5.

Partial least-squares discriminant analysis (PLS-DA) results, scores plot and variable importance plot, among women with GDM (n = 133), IADPSG diagnostic criteria, comparing metabolites concentrations between South Asian (START study; n = 81) and white European women (FAMILY study; n = 52)

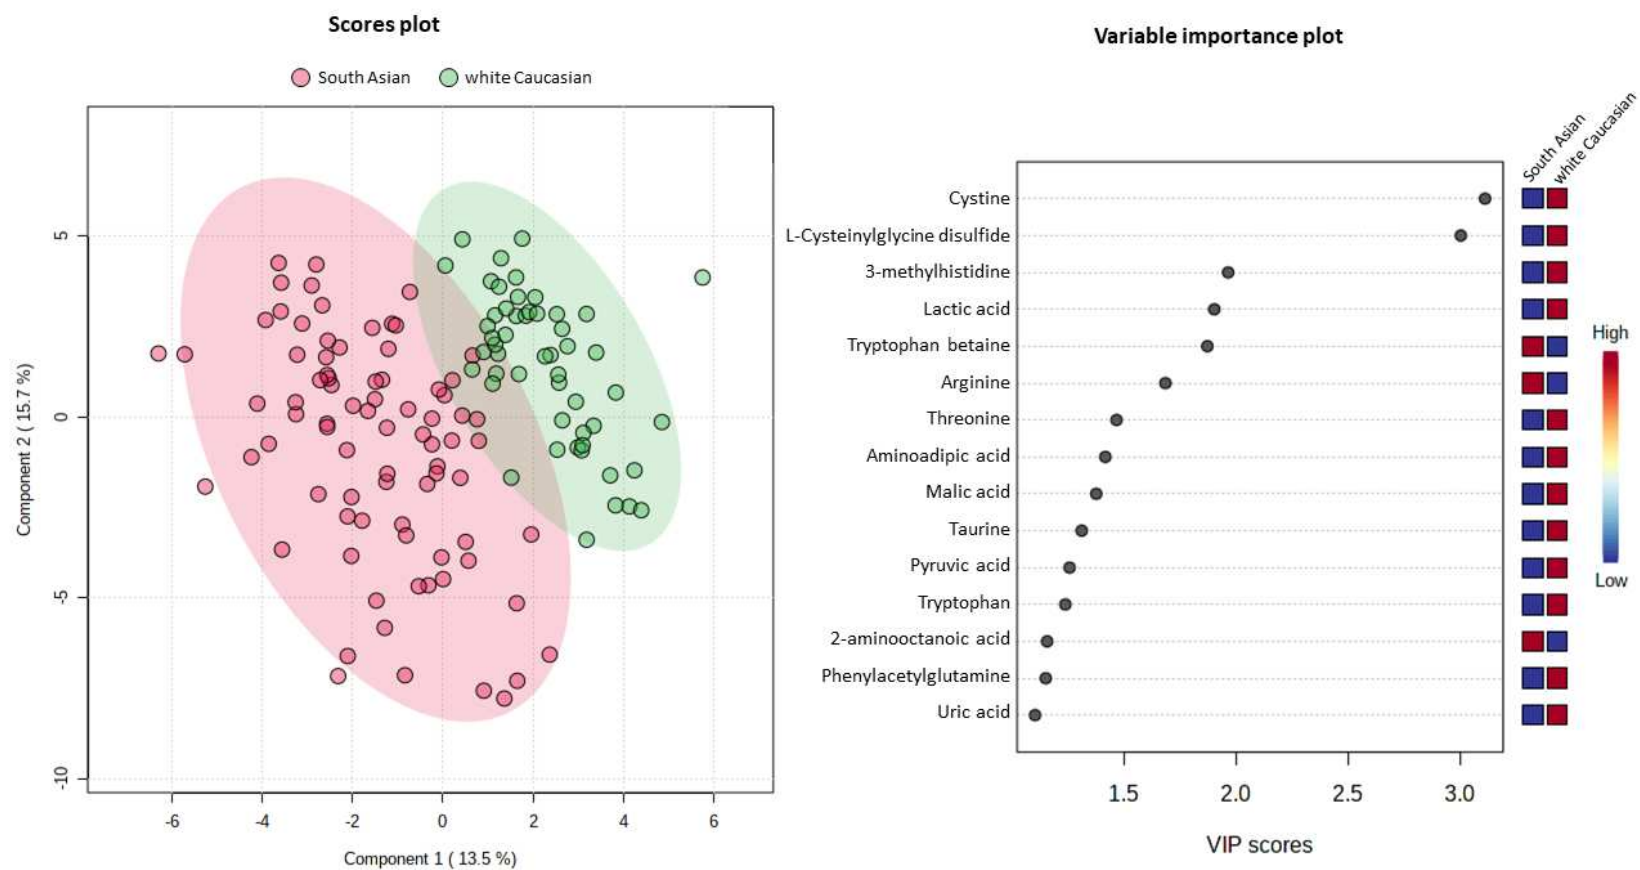

**Supplemental Figure S6.**

**Standardized mean difference (95% CI) in serum metabolites among women with GDM (n = 133), comparing South Asian (n = 81) to white European (n = 52) women, p < 0.05**

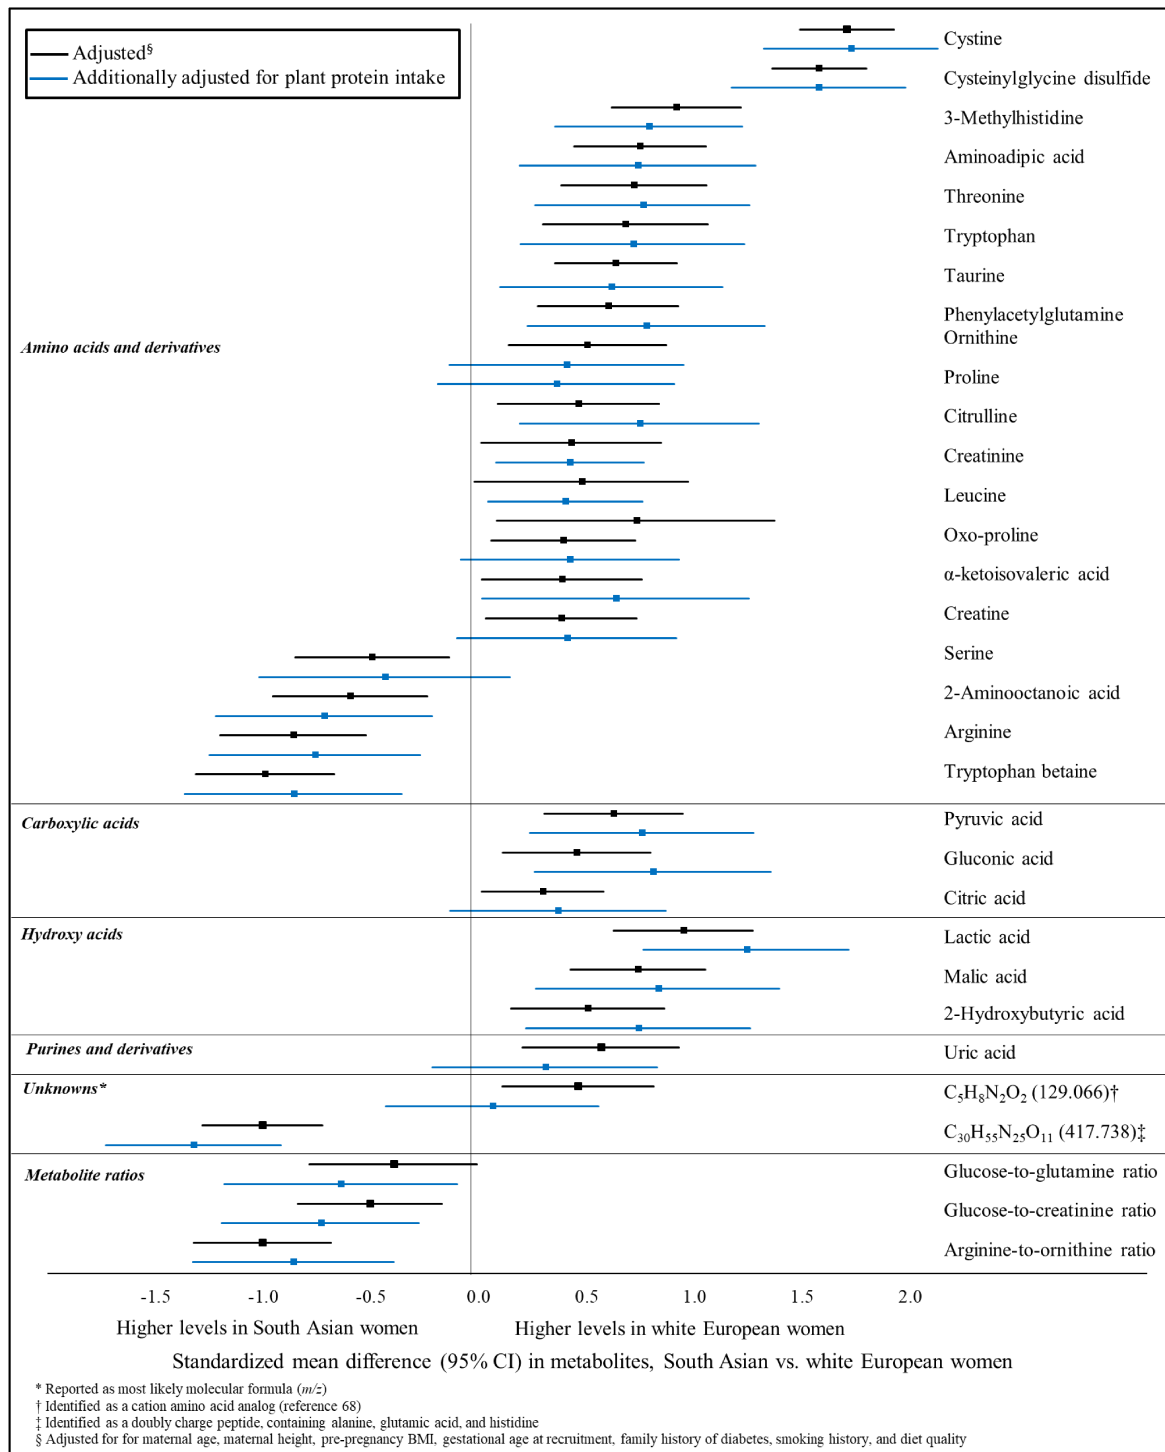



**Supplemental Figure S7.****Partial least-squares discriminant analysis (PLS-DA) results, scores plot and variable importance plot, IADPSG diagnostic criteria, START and FAMILY**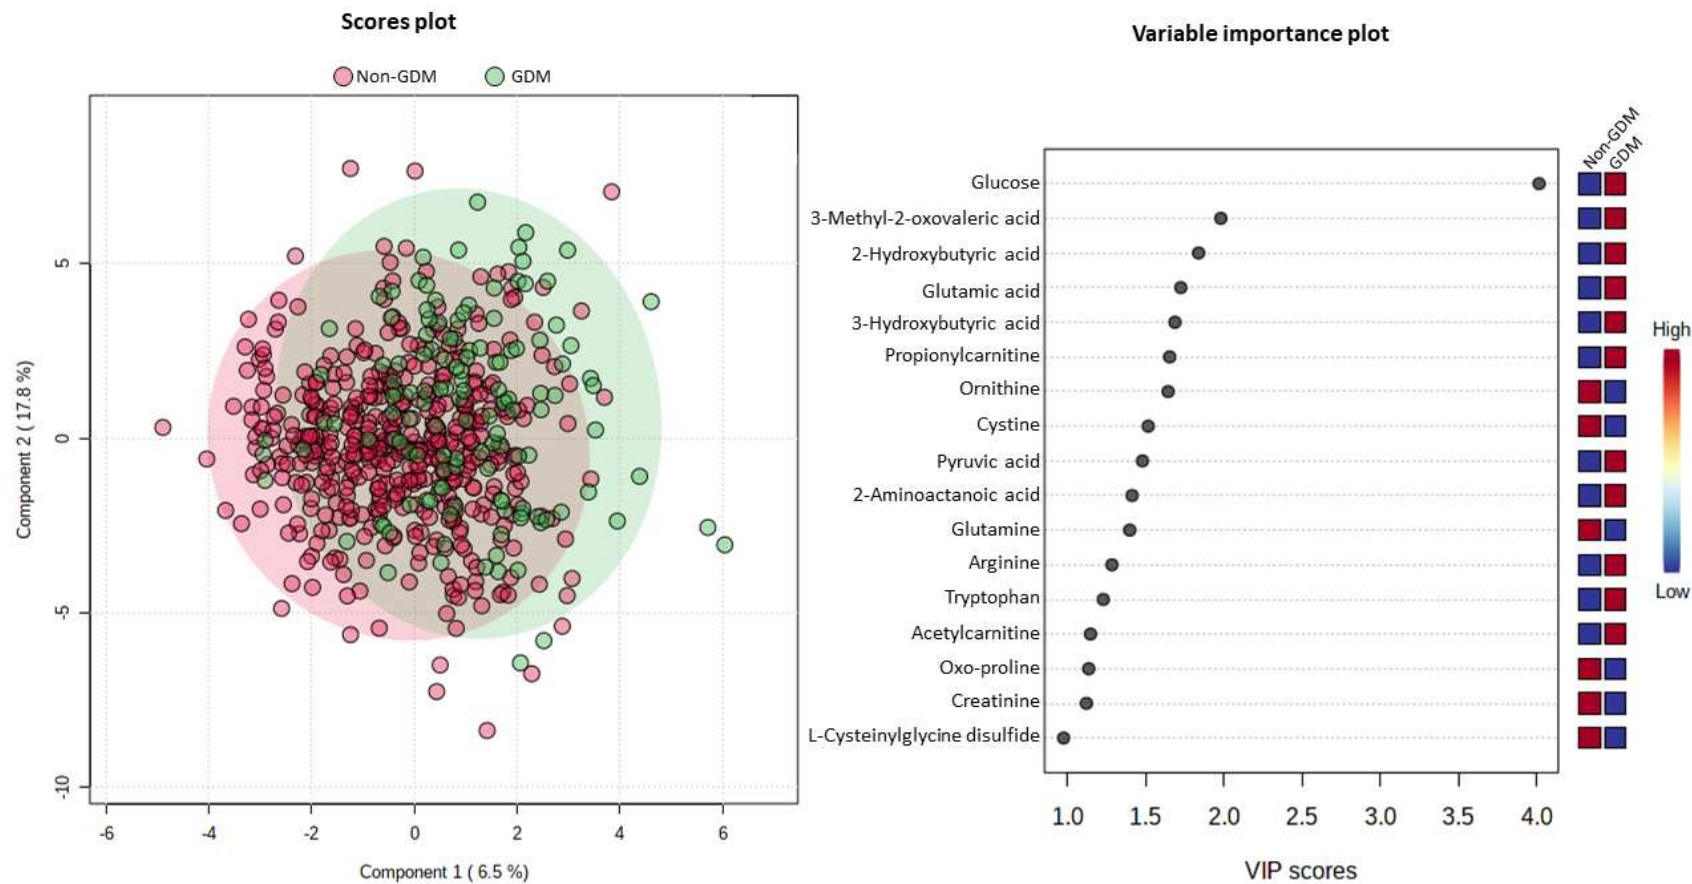

## References

1. Huynh J, Xiong G, Bentley-Lewis R. A systematic review of metabolite profiling in gestational diabetes mellitus. *Diabetologia*. 2014 Dec 1;57(12):2453-64
2. Chen Q, Francis E, Hu G, Chen L. Metabolomic profiling of women with gestational diabetes mellitus and their offspring: review of metabolomics studies. *Journal of Diabetes and its Complications*. 2018 May 1;32(5):512-23.
3. Garner P, Hopewell S, Chandler J, MacLehose H, Akl EA, Beyene J, Chang S, Churchill R, Dearness K, Guyatt G, Lefebvre C. When and how to update systematic reviews: consensus and checklist. *bmj*. 2016 Jul 20;354.
4. Chen X, Scholl TO, Leski M, Savaille J, Stein TP. Differences in maternal circulating fatty acid composition and dietary fat intake in women with gestational diabetes mellitus or mild gestational hyperglycemia. *Diabetes care*. 2010 Sep 1;33(9):2049-54.
5. Graça G, Duarte IF, Barros AS, Goodfellow BJ, Diaz SO, Pinto J, Carreira IM, Galhano E, Pita C, Gil AM. Impact of prenatal disorders on the metabolic profile of second trimester amniotic fluid: a nuclear magnetic resonance metabolomic study. *Journal of proteome research*. 2010 Nov 5;9(11):6016-24.
6. Diaz SO, Pinto J, Graça G, Duarte IF, Barros AS, Galhano E, Pita C, Almeida MD, Goodfellow BJ, Carreira IM, Gil AM. Metabolic biomarkers of prenatal disorders: an exploratory NMR metabolomics study of second trimester maternal urine and blood plasma. *Journal of proteome research*. 2011 Aug 5;10(8):3732-42.
7. Graça G, Goodfellow BJ, Barros AS, Diaz S, Duarte IF, Spagou K, Veselkov K, Want EJ, Lindon JC, Carreira IM, Galhano E. UPLC-MS metabolic profiling of second trimester amniotic fluid and maternal urine and comparison with NMR spectral profiling for the identification of pregnancy disorder biomarkers. *Molecular BioSystems*. 2012;8(4):1243-54.
8. Sachse D, Sletner L, Mørkrid K, Jenum AK, Birkeland KI, Rise F, Piehler AP, Berg JP. Metabolic changes in urine during and after pregnancy in a large, multiethnic population-based cohort study of gestational diabetes. *PLoS one*. 2012 Dec 21;7(12):e52399.
9. Diaz SO, Barros AS, Goodfellow BJ, Duarte IF, Galhano E, Pita C, Almeida MD, Carreira IM, Gil AM. Second trimester maternal urine for the diagnosis of trisomy 21 and prediction of poor pregnancy outcomes. *Journal of proteome research*. 2013 Jun 7;12(6):2946-57.
10. de Seymour JV, Conlon CA, Sulek K, Bôas SG, McCowan LM, Kenny LC, Baker PN. Early pregnancy metabolite profiling discovers a potential biomarker for the subsequent development of gestational diabetes mellitus. *Acta diabetologica*. 2014 Oct 1;51(5):887-90.
11. Bentley-Lewis R, Huynh J, Xiong G, Lee H, Wenger J, Clish C, Nathan D, Thadhani R, Gerszten R. Metabolomic profiling in the prediction of gestational diabetes mellitus. *Diabetologia*. 2015 Jun 1;58(6):1329-32.
12. Law KP, Mao X, Han TL, Zhang H. Unsaturated plasma phospholipids are consistently lower in the patients diagnosed with gestational diabetes mellitus throughout pregnancy: a longitudinal metabolomics study of Chinese pregnant women part 1. *Clin Chim Acta*. 2017;465:53-71, <https://doi.org/10.1016/j.cca.2016.12.010>.
13. Law KP, Han TL, Mao X, Zhang H. Tryptophan and purine metabolites are consistently upregulated in the urinary metabolome of patients diagnosed with gestational diabetes mellitus throughout pregnancy: A longitudinal metabolomics study of Chinese pregnant women part 2. *Clinica chimica acta*. 2017 May 1;468:126-39.
14. Leitner M, Fagner L, Danner S, Holeschovsky N, Leitner K, Tischler S, Doerfler H, Bachmann G, Sun X, Jaeger W, Kautzky-Willer A. Combined metabolomic analysis of plasma and urine reveals AHBA, Tryptophan and Serotonin metabolism as potential risk factors in Gestational Diabetes Mellitus (GDM). *Frontiers in Molecular Biosciences*. 2017 Dec 21;4:84.
15. Zhang Y, Dai X, Yang S, Zhang C, Han M, Huang HF, Fan J. Maternal low thyroxin levels are associated with adverse pregnancy outcomes in a Chinese population. *PLoS one*. 2017 May 23;12(5):e0178100.
16. Barzilay E, Moon A, Plumptre L, Masih SP, Sohn KJ, Visentin CE, Ly A, Malysheva O, Croxford R, Caudill MA, O'Connor DL. Fetal one-carbon nutrient concentrations may be affected by gestational diabetes. *Nutrition Research*. 2018 Jul 1;55:57-64.

17. Li J, Huo X, Cao YF, Li SN, Du Z, Shao P, Leng J, Zhang C, Sun XY, Ma RC, Fang ZZ. Bile acid metabolites in early pregnancy and risk of gestational diabetes in Chinese women: A nested case-control study. *EBioMedicine*. 2018 Sep 1;35:317-24.
18. Liu J, Li J, Li S, Leng J, Li W, Yang W, Huo X, Chen L, Ma RC, Hu G, Fang Z. Circulating lysophosphatidylcholines in early pregnancy and risk of gestational diabetes in Chinese women. *The Journal of Clinical Endocrinology & Metabolism*. 2020 Apr;105(4):e982-93.
19. O'Neill K, Alexander J, Azuma R, Xiao R, Snyder NW, Mesaros CA, Blair IA, Pinney SE. Gestational diabetes alters the metabolomic profile in 2nd trimester amniotic fluid in a sex-specific manner. *International journal of molecular sciences*. 2018 Sep;19(9):2696.
20. Roy C, Tremblay PY, Anassour-Laouan-Sidi E, Lucas M, Forest JC, Giguère Y, Ayotte P. Risk of gestational diabetes mellitus in relation to plasma concentrations of amino acids and acylcarnitines: A nested case-control study. *Diabetes research and clinical practice*. 2018 Jun 1;140:183-90.
21. Hou W, Meng X, Zhao A, Zhao W, Pan J, Tang J, Huang Y, Li H, Jia W, Liu F, Jia W. Development of multimarker diagnostic models from metabolomics analysis for gestational diabetes mellitus (GDM). *Molecular & Cellular Proteomics*. 2018 Mar 1;17(3):431-41.
22. Li P, Zhong C, Li S, Sun T, Huang H, Chen X, Zhu Y, Hu X, Peng X, Zhang X, Bao W. Plasma concentration of trimethylamine-N-oxide and risk of gestational diabetes mellitus. *The American journal of clinical nutrition*. 2018 Sep 1;108(3):603-10.
23. Huo X, Li J, Cao YF, Li SN, Shao P, Leng J, Li W, Liu J, Yang K, Ma RC, Hu G. Trimethylamine N-Oxide Metabolites in Early Pregnancy and Risk of Gestational Diabetes: A Nested Case-Control Study. *The Journal of Clinical Endocrinology & Metabolism*. 2019 Nov;104(11):5529-39.
24. Sakurai K, Eguchi A, Watanabe M, Yamamoto M, Ishikawa K, Mori C. Exploration of predictive metabolic factors for gestational diabetes mellitus in Japanese women using metabolomic analysis. *Journal of diabetes investigation*. 2019 Mar;10(2):513-20.
25. Liu X, Wang X, Sun H, Guo Z, Liu X, Yuan T, Fu Y, Tang X, Li J, Sun W, Zhao W. Urinary metabolic variation analysis during pregnancy and application in Gestational Diabetes Mellitus and spontaneous abortion biomarker discovery. *Scientific reports*. 2019 Feb 22;9(1):1-9.
26. Zhao H, Li H, Chung AC, Xiang L, Li X, Zheng Y, Luan H, Zhu L, Liu W, Peng Y, Zhao Y. Large-scale longitudinal metabolomics study reveals different trimester-specific alterations of metabolites in relation to gestational diabetes mellitus. *Journal of proteome research*. 2019 Nov 29;18(1):292-300.
27. Furse S, White SL, Meek CL, Jenkins B, Petry CJ, Vieira MC, Ozanne SE, Dunger DB, Poston L, Koulman A. Altered triglyceride and phospholipid metabolism predates the diagnosis of gestational diabetes in obese pregnancy. *Molecular omics*. 2019;15(6):420-30.
28. Jiang R, Wu S, Fang C, Wang C, Yang Y, Liu C, Hu J, Huang Y. Amino acids levels in early pregnancy predict subsequent gestational diabetes. *Journal of diabetes*. 2020 Jul;12(7):503-11.
29. Koos BJ, Gornbein JA. Early pregnancy metabolites predict gestational diabetes mellitus: implications for fetal programming. *American Journal of Obstetrics and Gynecology*. 2020 Jul 31.
30. Li X, Huang Y, Xing Y, Hu C, Zhang W, Tang Y, Su W, Huo X, Zhou A, Xia W, Xu S. Association of urinary cadmium, circulating fatty acids, and risk of gestational diabetes mellitus: A nested case-control study in China. *Environment International*. 2020 Apr 1;137:105527.
31. Butte NF, Hsu HW, Thotathuchery M, Wong WW, Khoury J, Reeds P. Protein metabolism in insulin-treated gestational diabetes. *Diabetes Care*. 1999 May 1;22(5):806-11.
32. Seghieri G, Breschi MC, Anichini R, De Bellis A, Alviggi L, Maida I, Franconi F. Serum homocysteine levels are increased in women with gestational diabetes mellitus. *Metabolism*. 2003 Jun 1;52(6):720-3.
33. Tarim E, Bagis T, Kilicdag E, Erkanli S, Aslan E, Sezgin N, Kuscu E. Elevated plasma homocysteine levels in gestational diabetes mellitus. *Acta obstetrica et gynecologica Scandinavica*. 2004 Jan 1;83(6):543-7.
34. Guven MA, Kilinc M, Batukan C, Ekerbicer HC, Aksu T. Elevated second trimester serum homocysteine levels in women with gestational diabetes mellitus. *Archives of gynecology and obstetrics*. 2006 Oct 1;274(6):333-7.
35. Pappa KI, Vlachos G, Theodora M, Roubelaki M, Angelidou K, Antsaklis A. Intermediate metabolism in association with the amino acid profile during the third trimester of normal pregnancy and diet-controlled gestational diabetes. *American journal of obstetrics and gynecology*. 2007 Jan 1;196(1):65-e1.

36. Idzior-Waluś B, Cyganek K, Sztefko K, Seghieri G, Breschi MC, Waluś-Miarka M, Kawalec E, Seretny M, Sieradzki J. Total plasma homocysteine correlates in women with gestational diabetes. *Archives of gynecology and obstetrics*. 2008 Oct 1;278(4):309-13.
37. Telejko B, Zonenberg A, Kuzmicki M, Modzelewska A, Niedziolko-Bagniuik K, Ponurkiewicz A, Nikolajuk A, Gorska M. Circulating asymmetric dimethylarginine, endothelin-1 and cell adhesion molecules in women with gestational diabetes. *Acta diabetologica*. 2009 Dec 1;46(4):303.
38. Akturk M, Altinova A, Mert I, Dincel A, Sargin A, Buyukkagnici U, Arslan M, Danisman N. Asymmetric dimethylarginine concentrations are elevated in women with gestational diabetes. *Endocrine*. 2010 Aug 1;38(1):134-41.
39. Sertkaya AC, Kafkasli A, Turkuoglu I, Karabulut AB. Asymmetric dimethylarginine level in hyperglycemic gestation. *Endocrine*. 2011 Oct 1;40(2):237-42.
40. Dudzik D, Zorawski M, Skotnicki M, Zarzycki W, Kozłowska G, Bibik-Malinowska K, Vallejo M, García A, Barbas C, Ramos MP. Metabolic fingerprint of gestational diabetes mellitus. *Journal of proteomics*. 2014 May 30;103:57-71.
41. Lorenzo MP, Dudzik D, Varas E, Gibellini M, Skotnicki M, Zorawski M, Zarzycki W, Pellati F, García A. Optimization and validation of a chiral GC-MS method for the determination of free d-amino acids ratio in human urine: application to a gestational diabetes mellitus study. *Journal of pharmaceutical and biomedical analysis*. 2015 Mar 25;107:480-7.
42. Prentice KJ, Luu L, Allister EM, Liu Y, Jun LS, Sloop KW, Hardy AB, Wei L, Jia W, Fantus IG, Sweet DH. The furan fatty acid metabolite CMPF is elevated in diabetes and induces  $\beta$  cell dysfunction. *Cell metabolism*. 2014 Apr 1;19(4):653-66.
43. Scholtens DM, Muehlbauer MJ, Daya NR, Stevens RD, Dyer AR, Lowe LP, Metzger BE, Newgard CB, Bain JR, Lowe WL, HAPO Study Cooperative Research Group. Metabolomics reveals broad-scale metabolic perturbations in hyperglycemic mothers during pregnancy. *Diabetes Care*. 2014 Jan 1;37(1):158-66.
44. Hajduk J, Klupczynska A, Dereziński P, Matysiak J, Kokot P, Nowak DM, Gajęcka M, Nowak-Markwitz E, Kokot ZJ. A combined metabolomic and proteomic analysis of gestational diabetes mellitus. *International journal of molecular sciences*. 2015 Dec;16(12):30034-45.
45. He X, de Seymour JV, Sulek K, Qi H, Zhang H, Han TL, Villas-Bôas SG, Baker PN. Maternal hair metabolome analysis identifies a potential marker of lipid peroxidation in gestational diabetes mellitus. *Acta diabetologica*. 2016 Feb 1;53(1):119-22.
46. Lehmann R, Friedrich T, Krebiehl G, Sonntag D, Häring HU, Fritsche A, Hennige AM. Metabolic profiles during an oral glucose tolerance test in pregnant women with and without gestational diabetes. *Exp Clin Endocrinol Diabetes*. 2015 Jul 1;123(7):483-38.
47. Gao J, Xu B, Zhang X, Cui Y, Deng L, Shi Z, Shao Y, Ding M. Association between serum bile acid profiles and gestational diabetes mellitus: a targeted metabolomics study. *Clinica Chimica Acta*. 2016 Aug 1;459:63-72.
48. Liu T, Li J, Xu F, Wang M, Ding S, Xu H, Dong F. Comprehensive analysis of serum metabolites in gestational diabetes mellitus by UPLC/Q-TOF-MS. *Analytical and bioanalytical chemistry*. 2016 Feb 1;408(4):1125-35.
49. Chorell E, Hall UA, Gustavsson C, Berntorp K, Puhkala J, Luoto R, Olsson T, Holmäng A. Pregnancy to postpartum transition of serum metabolites in women with gestational diabetes. *Metabolism*. 2017 Jul 1;72:27-36.
50. Rahimi N, Razi F, Nasli-Esfahani E, Qorbani M, Shirzad N, Larijani B. Amino acid profiling in the gestational diabetes mellitus. *Journal of Diabetes & Metabolic Disorders*. 2017 Dec 1;16(1):13.
51. Delplancke TD, de Seymour JV, Tong C, Sulek K, Xia Y, Zhang H, Han TL, Baker PN. Analysis of sequential hair segments reflects changes in the metabolome across the trimesters of pregnancy. *Scientific reports*. 2018 Jan 8;8(1):1-2.
52. Batchuluun B, Al Rijjal D, Prentice KJ, Eversley JA, Burdett E, Mohan H, Bhattacharjee A, Gunderson EP, Liu Y, Wheeler MB. Elevated medium-chain acylcarnitines are associated with gestational diabetes mellitus and early progression to type 2 diabetes and induce pancreatic  $\beta$ -cell dysfunction. *Diabetes*. 2018 May 1;67(5):885-97.

53. Bukowiecka-Matusiak M, Burzynska-Pedziwiatr I, Sansone A, Malachowska B, Zurawska-Klis M, Ferreri C, Chatgillialoglu C, Ochedalski T, Cypryk K, Wozniak LA. Lipid profile changes in erythrocyte membranes of women with diagnosed GDM. *PLoS One*. 2018 Sep 14;13(9):e0203799.
54. Chen X, de Seymour JV, Han TL, Xia Y, Chen C, Zhang T, Zhang H, Baker PN. Metabolomic biomarkers and novel dietary factors associated with gestational diabetes in China. *Metabolomics*. 2018 Nov 1;14(11):149.
55. Li G, Gao W, Xu Y, Xie M, Tang S, Yin P, Guo S, Chu S, Sultana S, Cui S. Serum metabolomics study of pregnant women with gestational diabetes mellitus based on LC-MS. *Saudi Journal of Biological Sciences*. 2019 Dec 1;26(8):2057-63.
56. López-Hernández Y, Oostdam HV, Sofía A, Toro-Ortiz JC, López JA, Salgado-Bustamante M, Murgu M, Torres-Torres LM. Urinary metabolites altered during the third trimester in pregnancies complicated by gestational diabetes mellitus: relationship with potential upcoming metabolic disorders. *International journal of molecular sciences*. 2019 Jan;20(5):1186.
57. Taylor K, Santos Ferreira D, West J, Yang T, Caputo M, Lawlor D. Differences in pregnancy metabolic profiles and their determinants between white European and South Asian women: findings from the born in Bradford Cohort. *Metabolites*. 2019 Sep;9(9):190.
58. He XJ, Dai RX, Tian CQ, Hu CL. Neurodevelopmental outcome at 1 year in offspring of women with gestational diabetes mellitus. *Gynecological Endocrinology*. 2020 Apr 20:1-5.
59. Burzynska-Pedziwiatr I, Jankowski A, Kowalski K, Sendys P, Zieleniak A, Cypryk K, Zurawska-Klis M, Wozniak LA, Bukowiecka-Matusiak M. Associations of Arginine with Gestational Diabetes Mellitus in a Follow-Up Study. *International journal of molecular sciences*. 2020 Jan;21(21):7811.
60. Walejko JM, Chelliah A, Keller-Wood M, Wasserfall C, Atkinson M, Gregg A, Edison AS. Diabetes Leads to Alterations in Normal Metabolic Transitions of Pregnancy as Revealed by Time-Course Metabolomics. *Metabolites*. 2020 Sep;10(9):350.
61. Wang X, Liu H, Li Y, Huang S, Zhang L, Cao C, Baker PN, Tong C, Zheng P, Qi H. Altered gut bacterial and metabolic signatures and their interaction in gestational diabetes mellitus. *Gut Microbes*. 2020 Nov 9;12(1):1-3.
62. Tan B, Ma Y, Zhang L, Li N, Zhang J. The application of metabolomics analysis in the research of gestational diabetes mellitus and preeclampsia. *Journal of Obstetrics and Gynaecology Research*. 2020 Jun 4.
63. Cetin I, De Santis MS, Taricco E, Radaelli T, Teng C, Ronzoni S, Spada E, Milani S, Pardi G. Maternal and fetal amino acid concentrations in normal pregnancies and in pregnancies with gestational diabetes mellitus. *American journal of obstetrics and gynecology*. 2005 Feb 1;192(2):610-7.
64. Anderson SG, Dunn WB, Banerjee M, Brown M, Broadhurst DI, Goodacre R, Cooper GJ, Kell DB, Cruickshank JK. Evidence that multiple defects in lipid regulation occur before hyperglycemia during the prodrome of type-2 diabetes. *PLoS One*. 2014 Sep 3;9(9):e103217.
65. Chertok IR, Haile ZT, Eventov-Friedman S, Silanikove N, Argov-Argaman N. Influence of gestational diabetes mellitus on fatty acid concentrations in human colostrum. *Nutrition*. 2017 Apr 1;36:17-21.
66. Lu YP, Reichetzedder C, Prehn C, von Websky K, Slowinski T, Chen YP, Yin LH, Kleuser B, Yang XS, Adamski J, Hochoer B. Fetal serum metabolites are independently associated with gestational diabetes mellitus. *Cellular Physiology and Biochemistry*. 2018;45(2):625-38.
67. Chu AH, Tint MT, Chang HF, Wong G, Yuan WL, Tull D, Nijagal B, Narayana VK, Meikle PJ, Chang KT, Lewis RM. High placental inositol content associated with suppressed pro-adipogenic effects of maternal glycaemia in offspring: the GUSTO cohort. *International Journal of Obesity*. 2020 May 20:1-1.
68. Shanmuganathan M, Kroezen Z, Gill B, Azab S, de Souza RJ, Teo KK, Atkinson S, Subbarao P, Desai D, Anand SS, Britz-McKibbin P. The maternal serum metabolome by multisegment injection-capillary electrophoresis-mass spectrometry: a high-throughput platform and standardized data workflow for large-scale epidemiological studies. *Nature Protocols*. 2021 Mar 5:1-29. <https://doi.org/10.1038/s41596-020-00475-0>
